# Supplementary material for: Syntheses and catalytic application of hydrido iron(ii) complexes with [P,S]-chelating ligands in hydrosilylation of aldehydes and ketones
Source: Royal Society of Chemistry journal article supplement (doi:10.1039/c5ra09330a), 2015-01-01

## **Syntheses and Catalytic Application of Hydrido Iron(II) Complexes with [P,S]- Chelating Ligands in Hydrosilylation of Aldehydes and Ketones**

Benjing Xue, Hongjian Sun and Xiaoyan Li\*

*School of Chemistry and Chemical Engineering, Key Laboratory of Special  
Functional Aggregated Materials, Ministry of Education, Shandong University,  
Shanda Nanlu 27, 250199 Jinan, PR China*

*E-mail: xli63@sdu.edu.cn; Fax: +86 531 88361350*

### **Table of Contents**

|                                           |       |
|-------------------------------------------|-------|
| 1 IR and NMR data of complexes <b>2-4</b> | 2-7   |
| 2 GC data for the catalytic reaction      | 8-10  |
| 3 NMR data of mechanism study             | 11-13 |
| 4 NMR data for the alcohol products       | 14-28 |

1 IR and NMR data of complexes 2-4

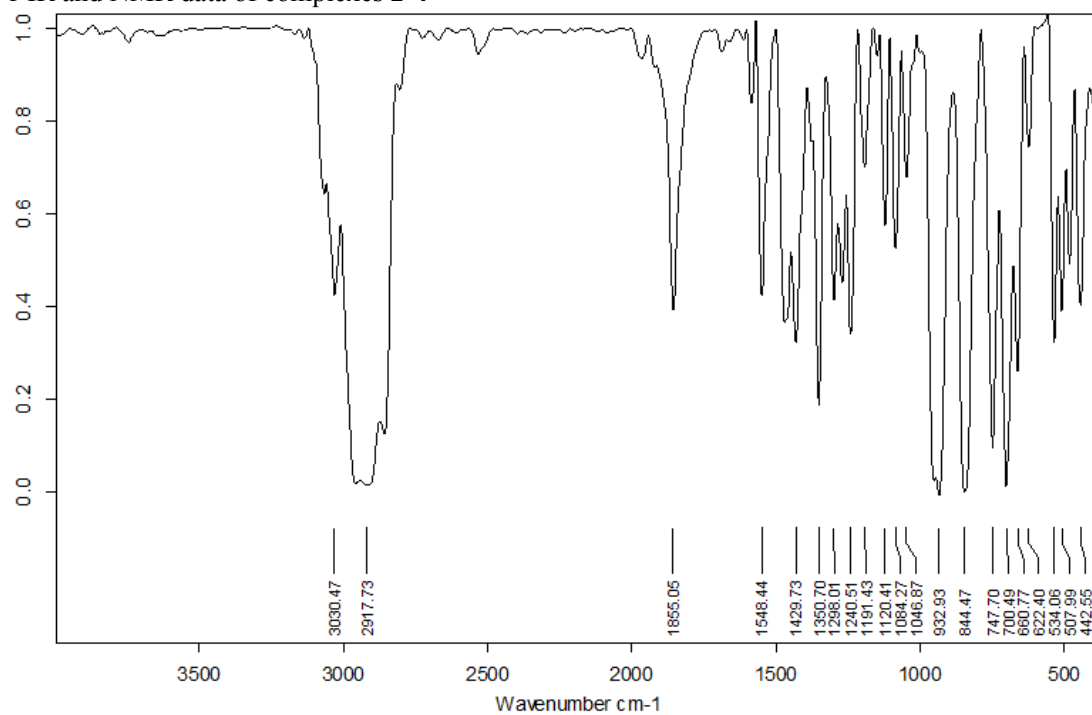

IR spectrum of complex 2

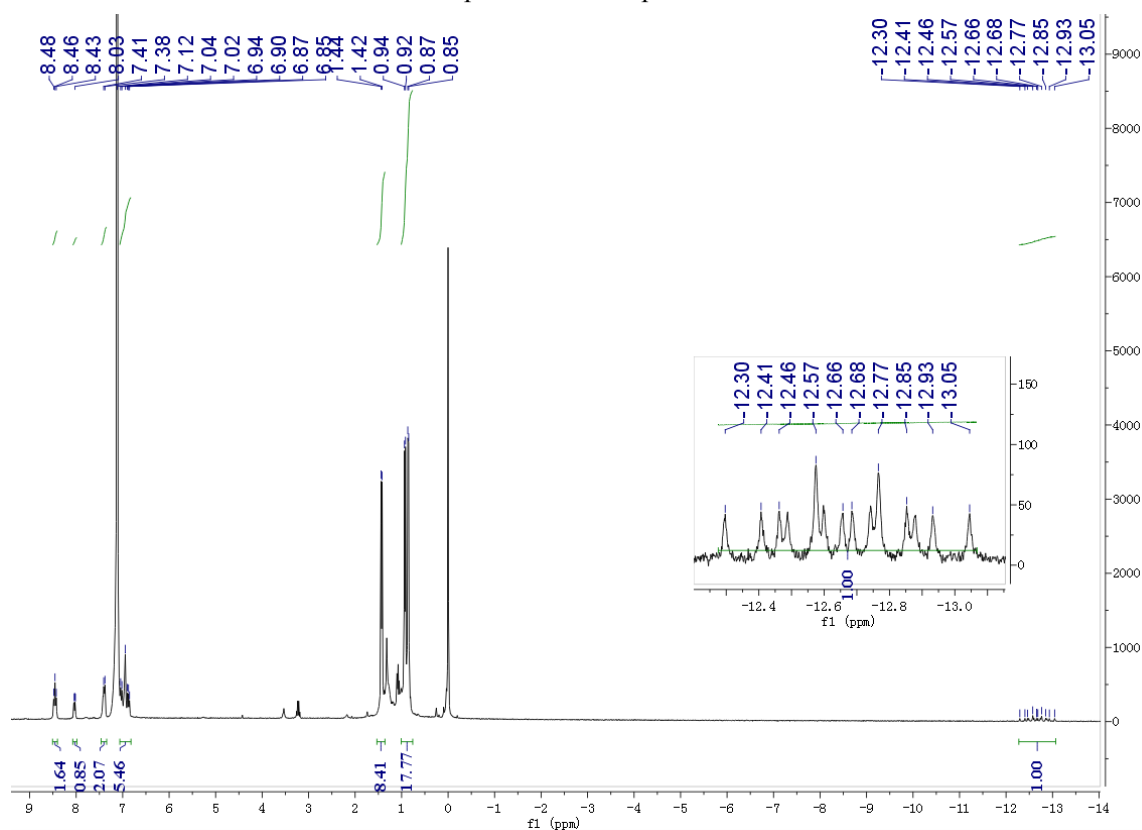

<sup>1</sup>H NMR spectrum of complex 2

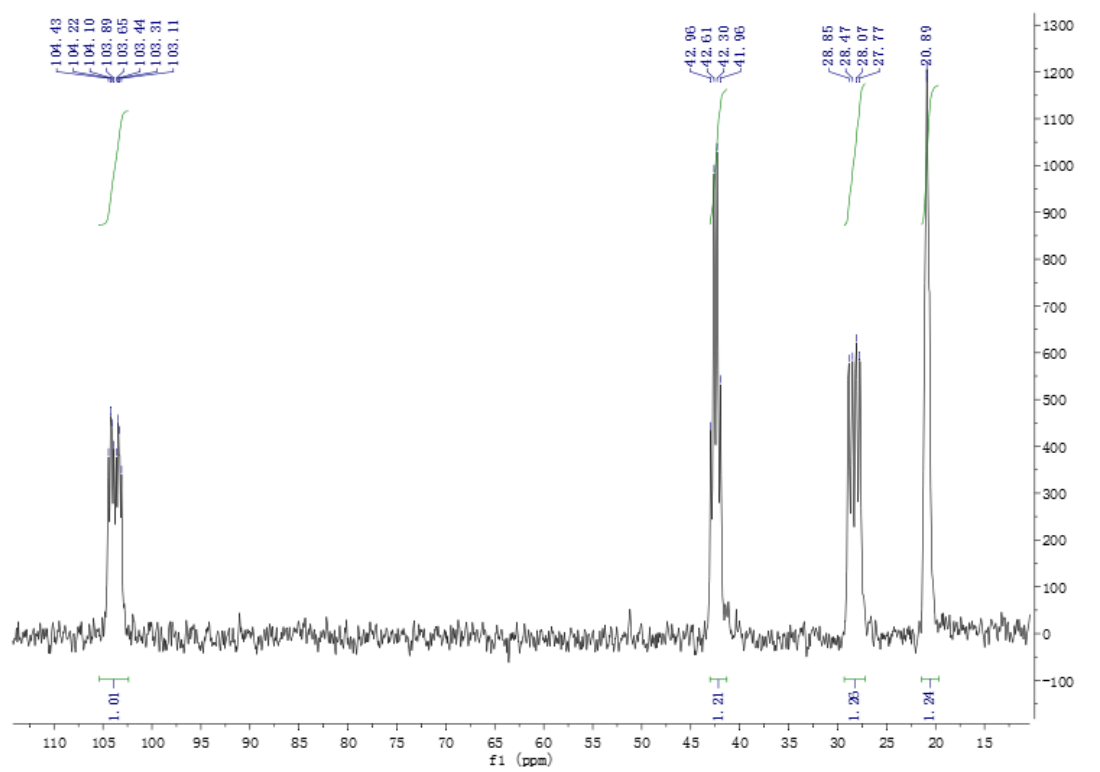

$^{31}\text{P}$  NMR spectrum of complex 2

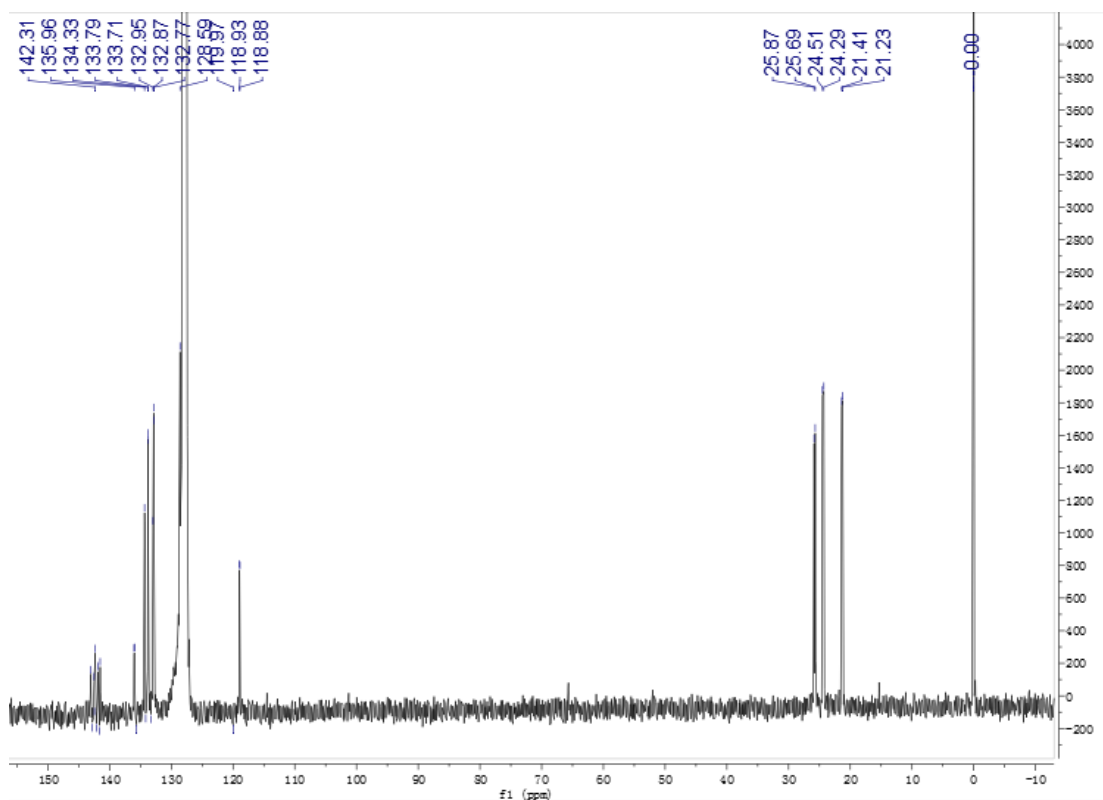

$^{13}\text{C}$  NMR spectrum of complex 2

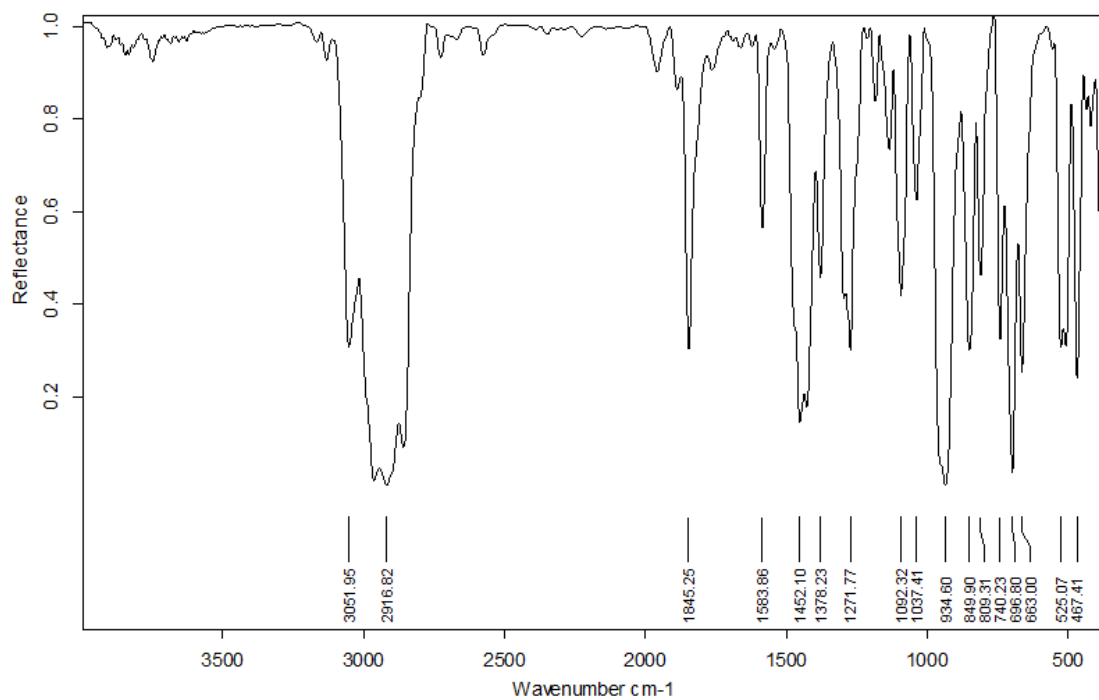

IR spectrum of complex 3

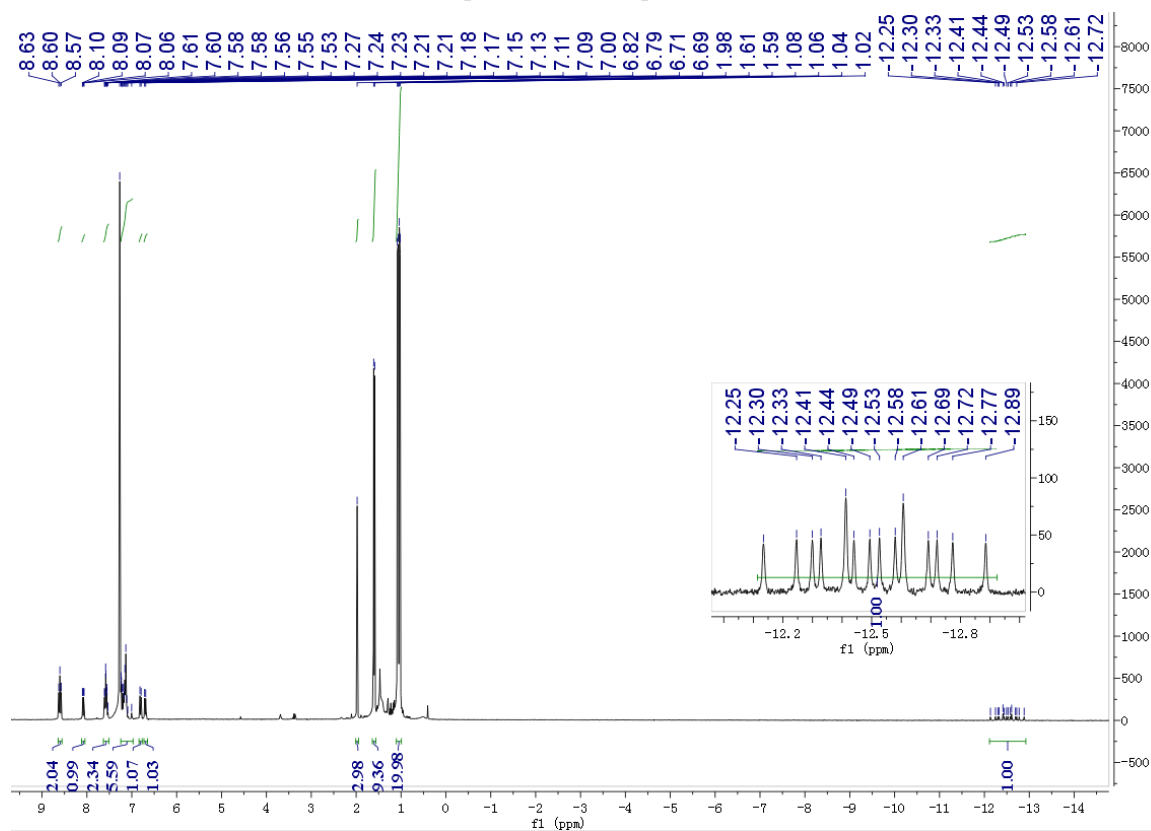

<sup>1</sup>H NMR spectrum of complex 3

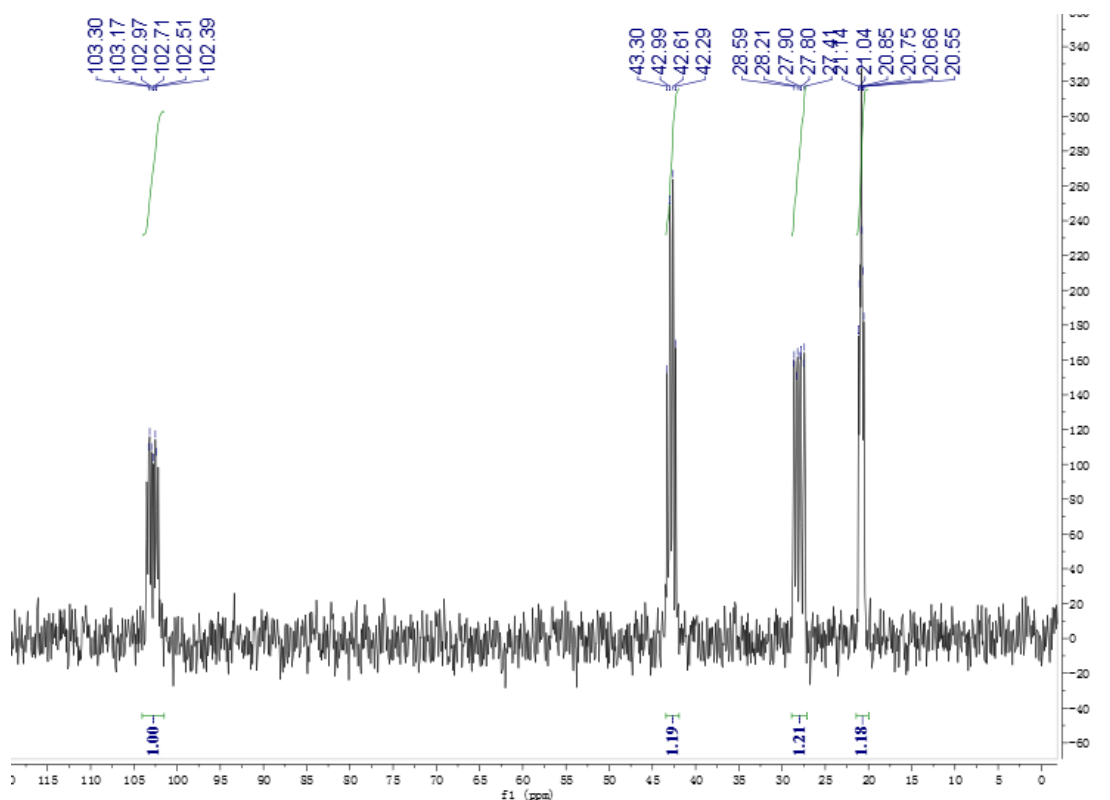

<sup>31</sup>P NMR spectrum of complex 3

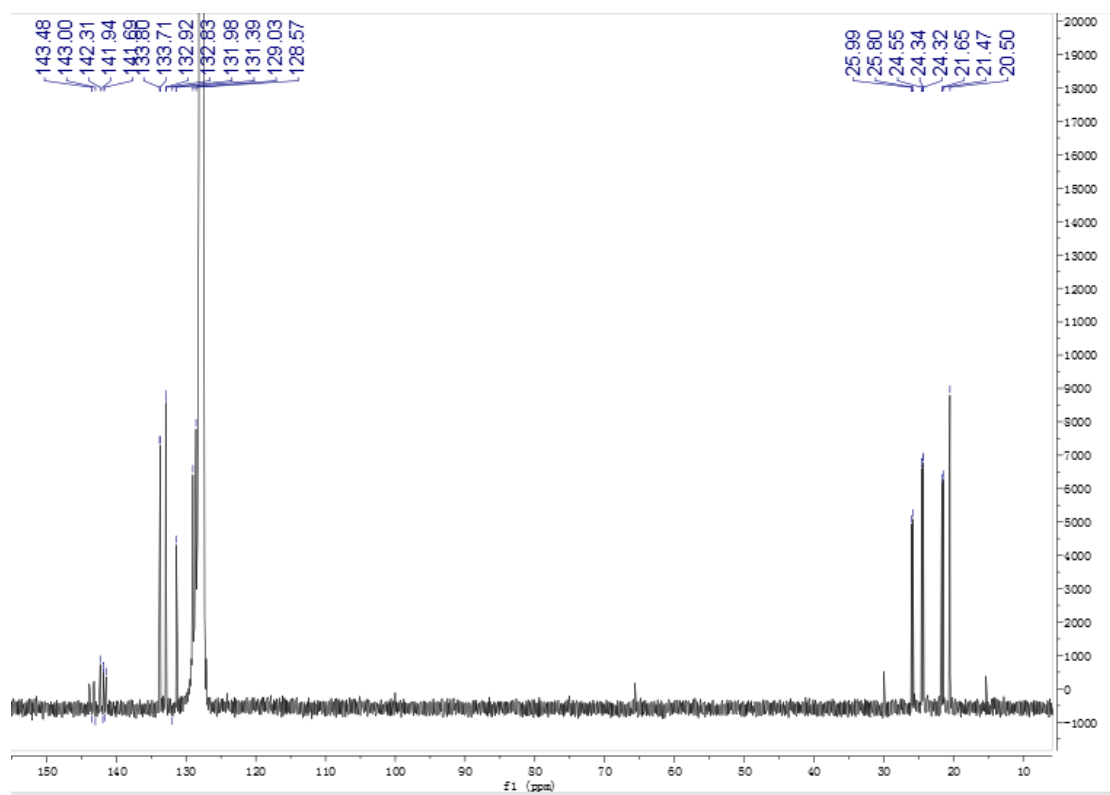

<sup>13</sup>C NMR spectrum of complex 3

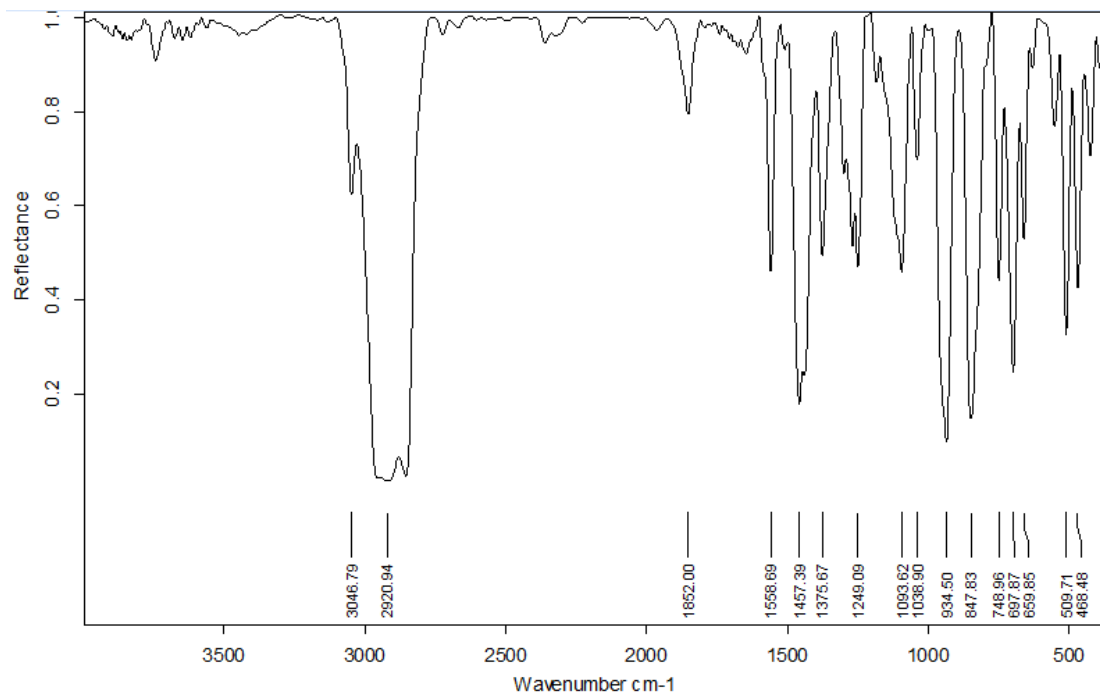

IR spectrum of complex 4

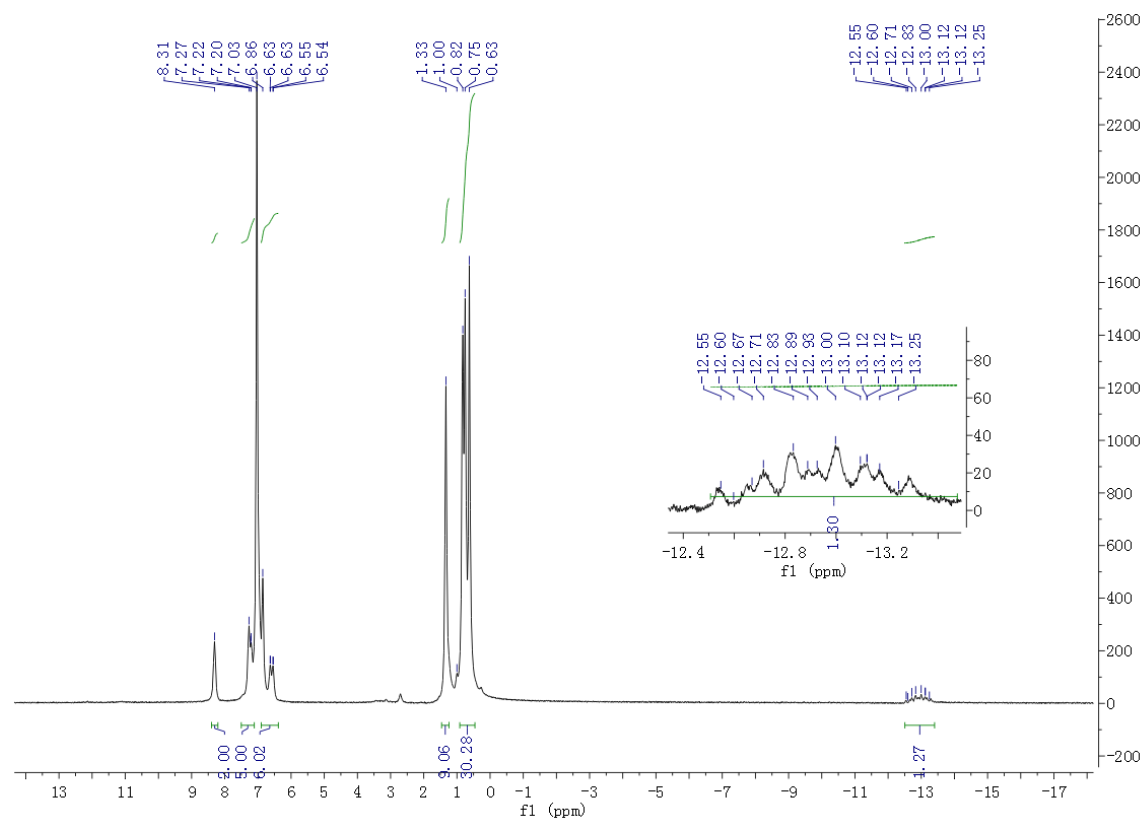

<sup>1</sup>H NMR spectrum of complex 4

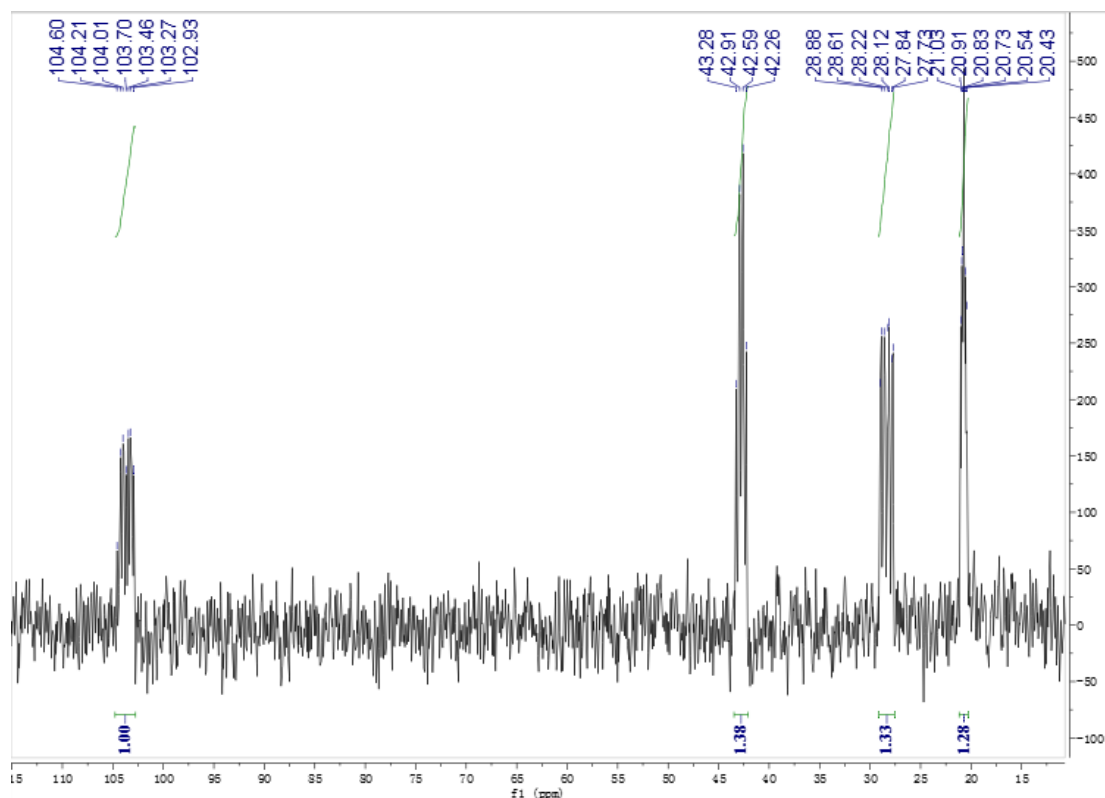

<sup>31</sup>P NMR spectrum of complex 4

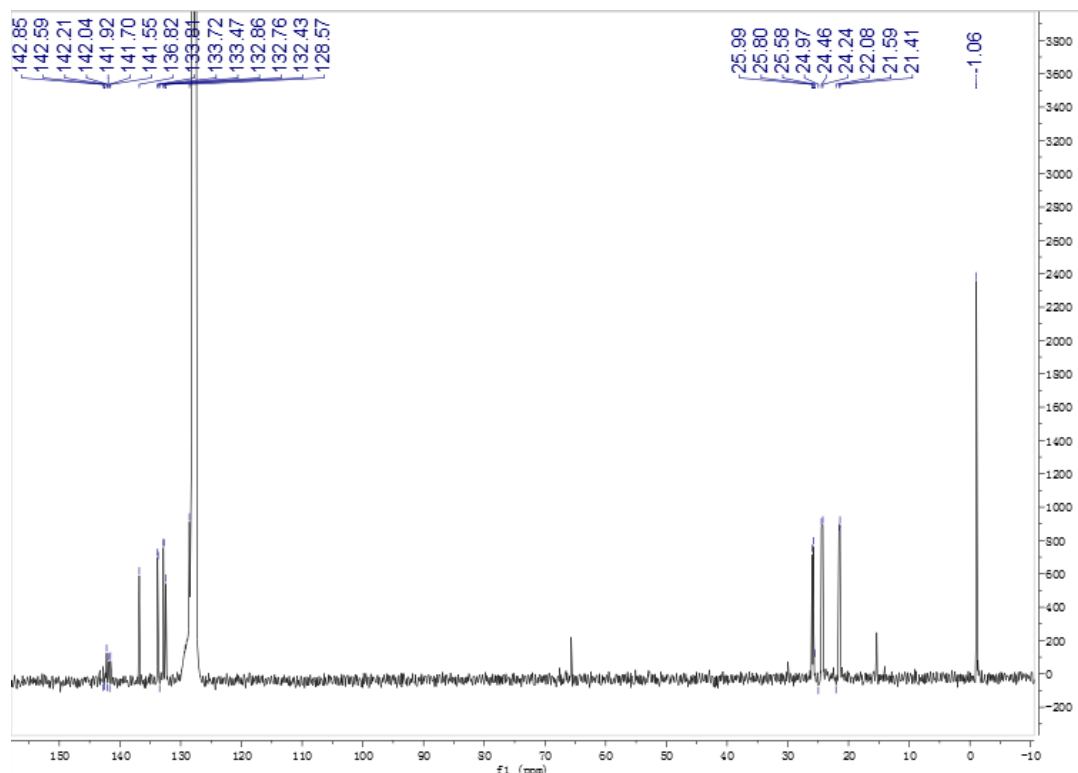

<sup>13</sup>C NMR spectrum of complex 4

2 GC data for the catalytic reaction

**Table 2** Catalytic Hydrosilylation of Aldehydes with **1** as a Catalyst<sup>a</sup>

| Entry | Substrates                                                                          | <sup>b</sup> Conversion (%) |
|-------|-------------------------------------------------------------------------------------|-----------------------------|
| 1     | 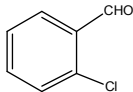   | 80                          |
| 2     |    | 80                          |
| 3     |    | 40                          |
| 4     |    | >99                         |
| 5     |   | >99                         |
| 6     |  | >99                         |
| 7     |  | >99                         |
| 8     |  | 38                          |
| 9     |  | 14                          |
| 10    |  | 21                          |
| 11    |  | 96                          |
| 12    |  | 98                          |



|    |                                                                                   |    |
|----|-----------------------------------------------------------------------------------|----|
| 13 | 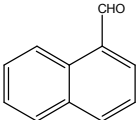 | 92 |
| 14 |  | 99 |
| 15 |  | 95 |

<sup>a</sup>Catalytic reaction conditions: RCHO (1.0 mmol), (EtO)<sub>3</sub>SiH (1.2 mmol) and *n*-dodecane (internal standard) (1.0 mmol), 2 ml THF, 50°C, 2h.

<sup>b</sup>Determined by GC analysis.

**Table 3** Catalytic Hydrosilylation of Ketones with **1** as a Catalyst<sup>a</sup>

| Entry | Substrates                                                                          | <sup>b</sup> Conversion(%) |
|-------|-------------------------------------------------------------------------------------|----------------------------|
| 1     | 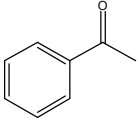   | 56                         |
| 2     |  | 46                         |
| 3     |  | 57                         |
| 4     |  | 64                         |
| 5     |  | 53                         |
| 6     |  | 37                         |
| 7     |  | 71                         |
| 8     |  | 64                         |

<sup>a</sup>Catalytic reaction conditions: RCOR' (1.0 mmol), (EtO)<sub>3</sub>SiH (1.2 mmol) and *n*-dodecane (internal standard) (1.0 mmol), 2 ml THF, 50°C, 24h.

<sup>b</sup>Determined by GC analysis.

### 3 NMR data of mechanism study

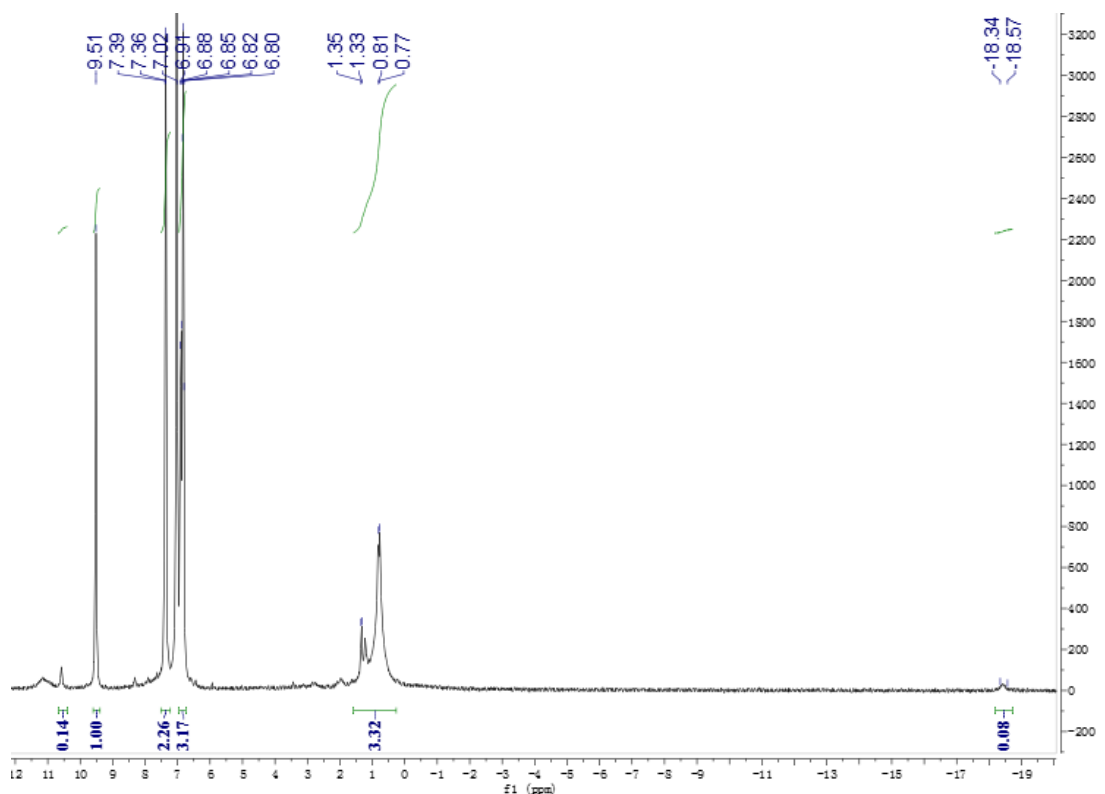

### Stoichiometric reactions of complex **1** with benzaldehyde (<sup>1</sup>H NMR)

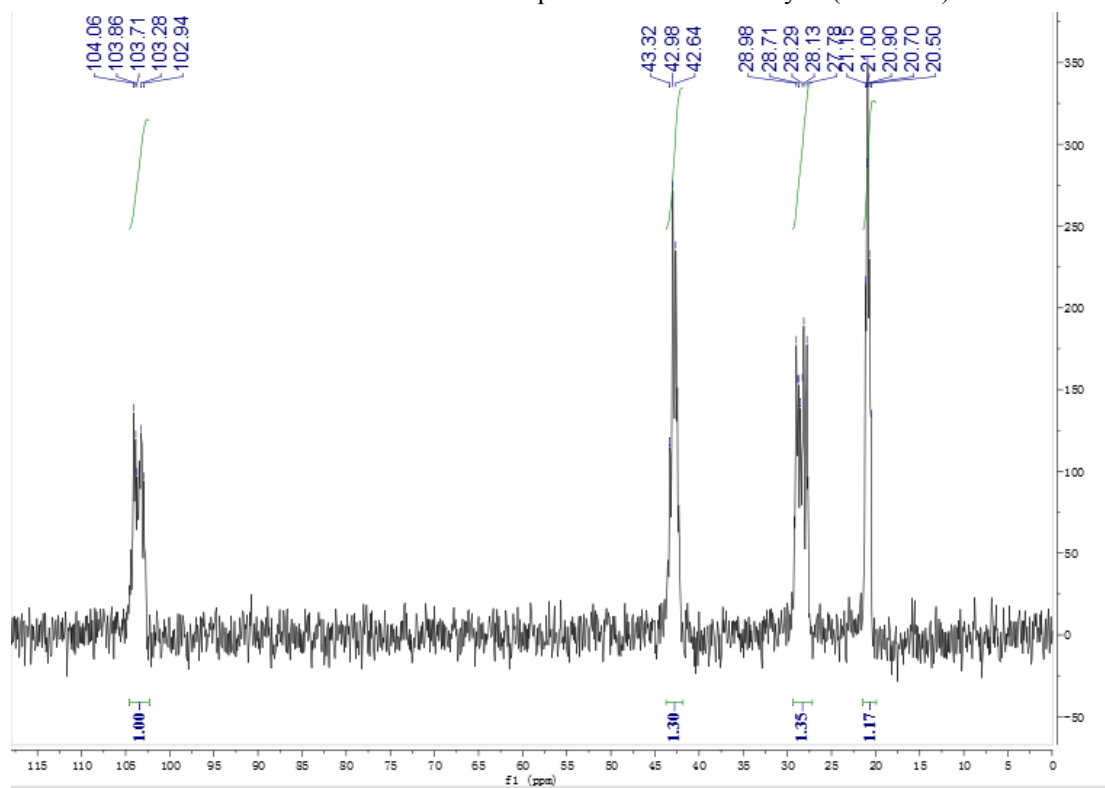

### Stoichiometric reactions of complex **1** with benzaldehyde (<sup>31</sup>P NMR)

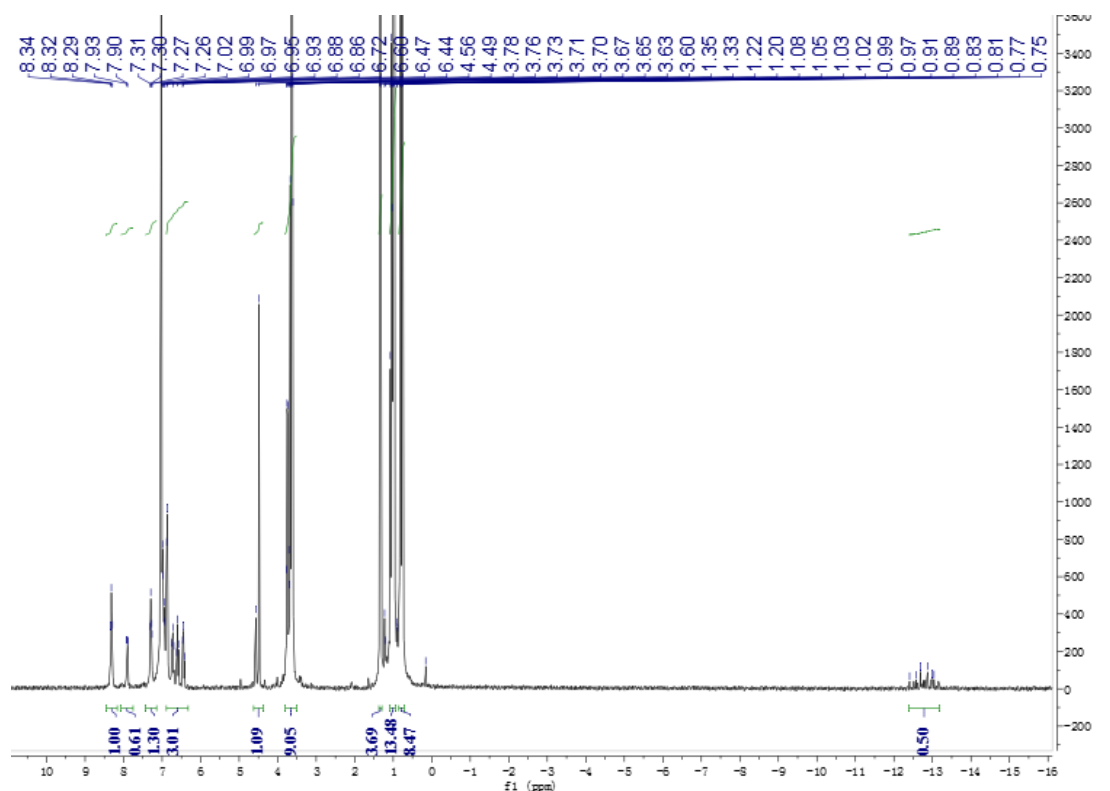

Stoichiometric reactions of complex **1** with triethoxysilane ( $^1\text{H}$  NMR)

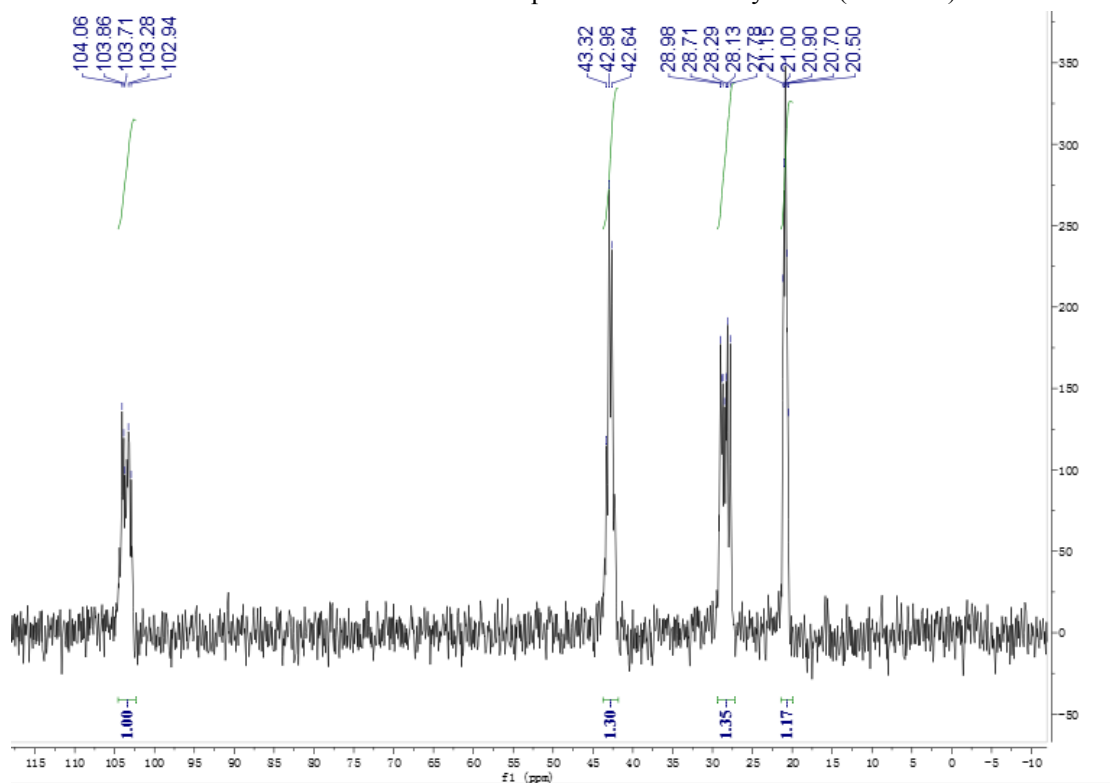

Stoichiometric reactions of complex **1** with triethoxysilane ( $^{31}\text{P}$  NMR)

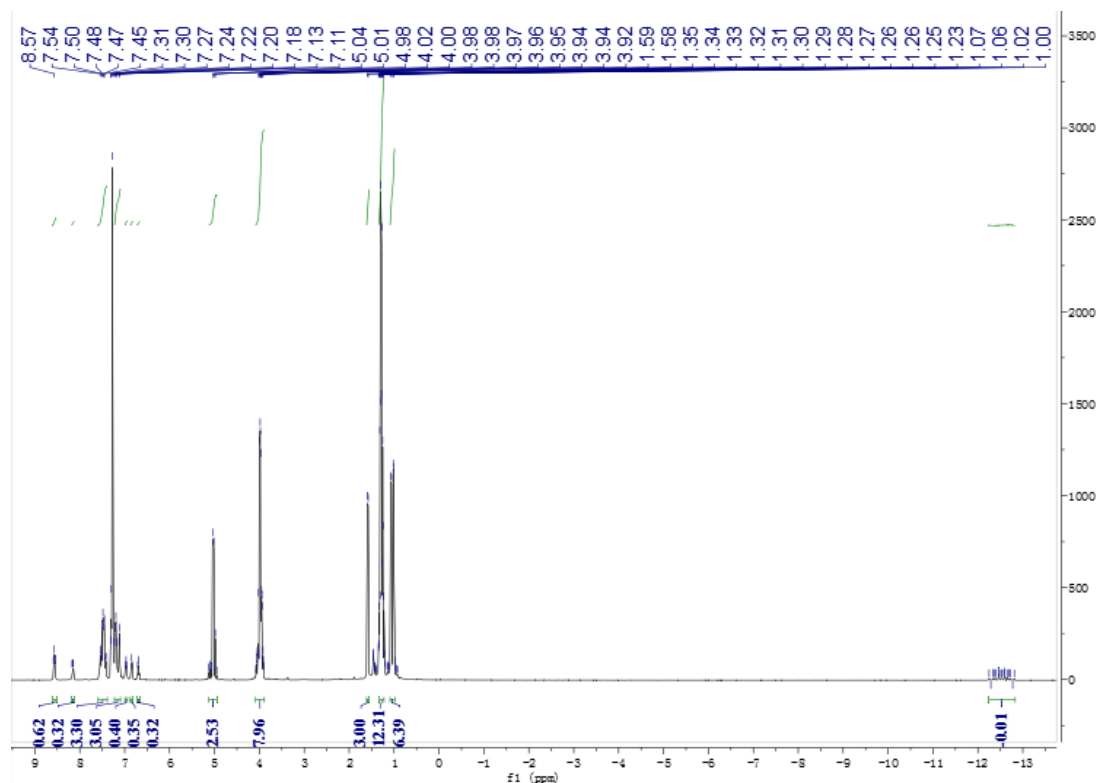

Stoichiometric reactions of complex **1** with benzaldehyde and triethoxysilane ( $^1\text{H}$  NMR)

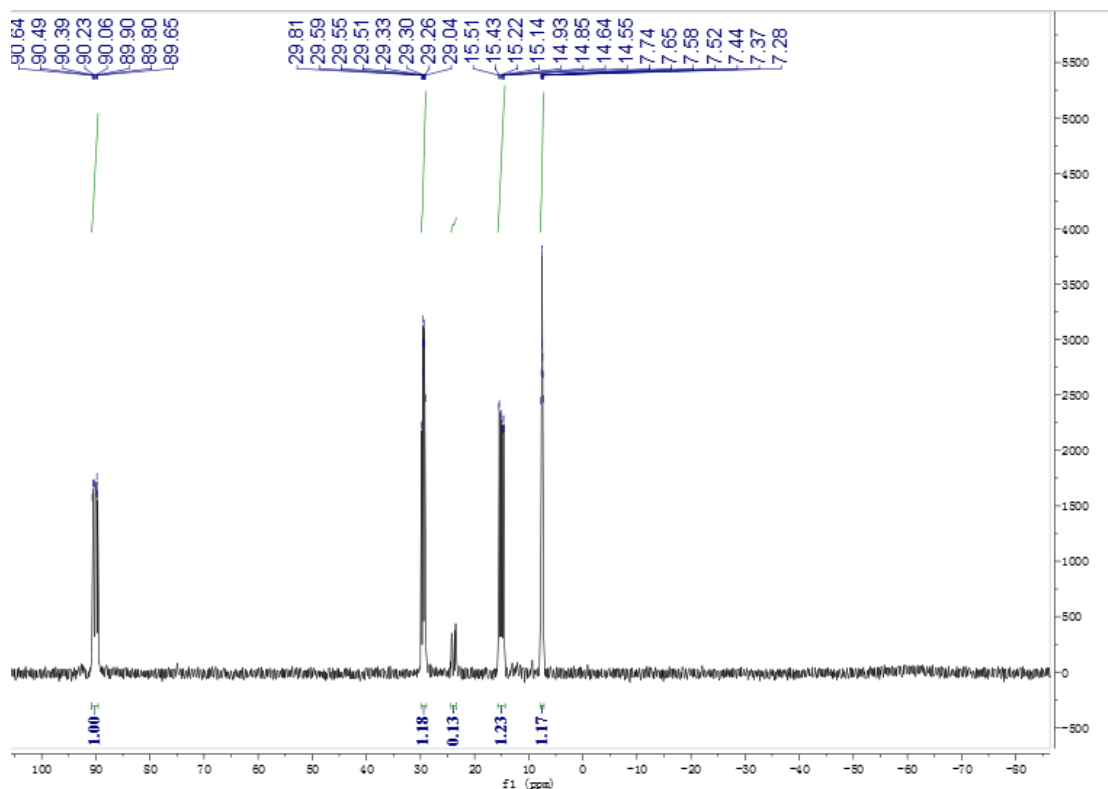

Stoichiometric reactions of complex **1** with benzaldehyde and triethoxysilane ( $^{31}\text{P}$  NMR)

4 NMR data for the alcohol products

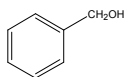

$^1\text{H}$  NMR (300 MHz,  $\text{CDCl}_3$ ,  $\delta$ ): 7.35-7.21 (m, Ar, 5H), 4.57 (s,  $\text{CH}_2$ , 2H), 2.67 (s, OH, 1H).

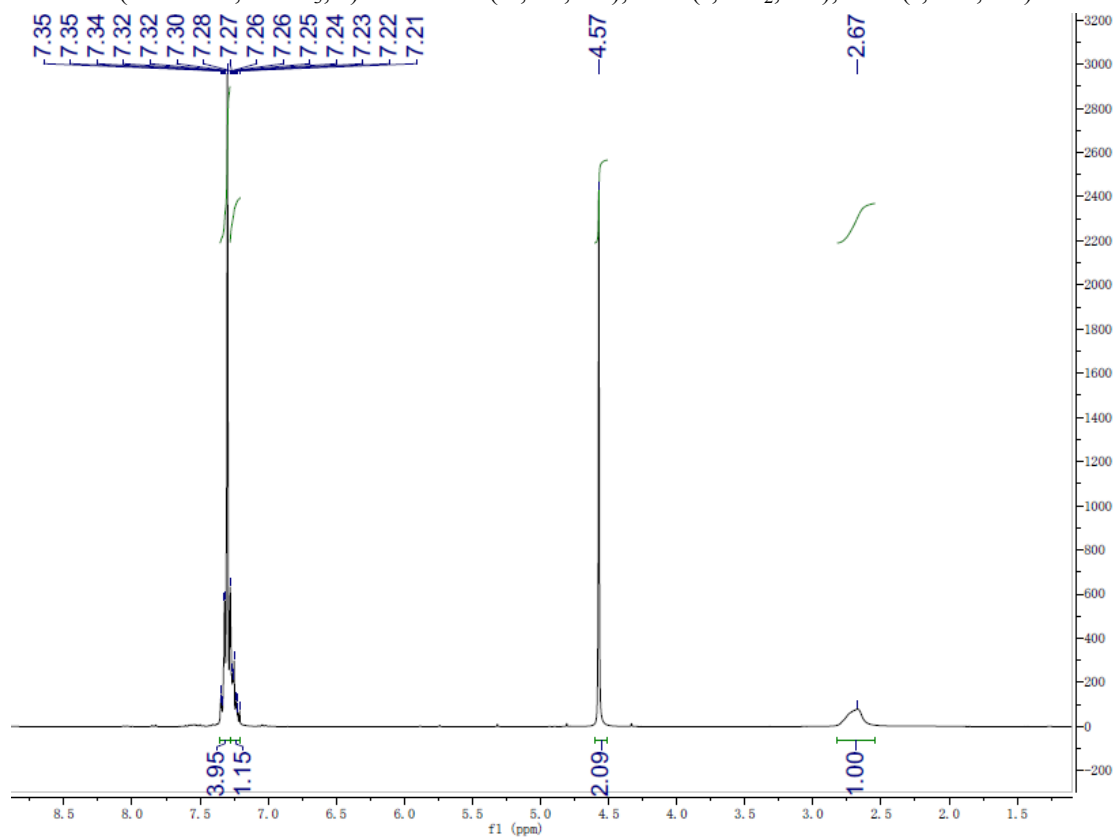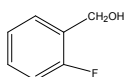

$^1\text{H}$  NMR (300 MHz,  $\text{CDCl}_3$ ,  $\delta$ ): 7.40-6.99 (m, Ar, 4H), 4.70 (s,  $\text{CH}_2$ , 2H), 2.59 (s, OH, 1H).

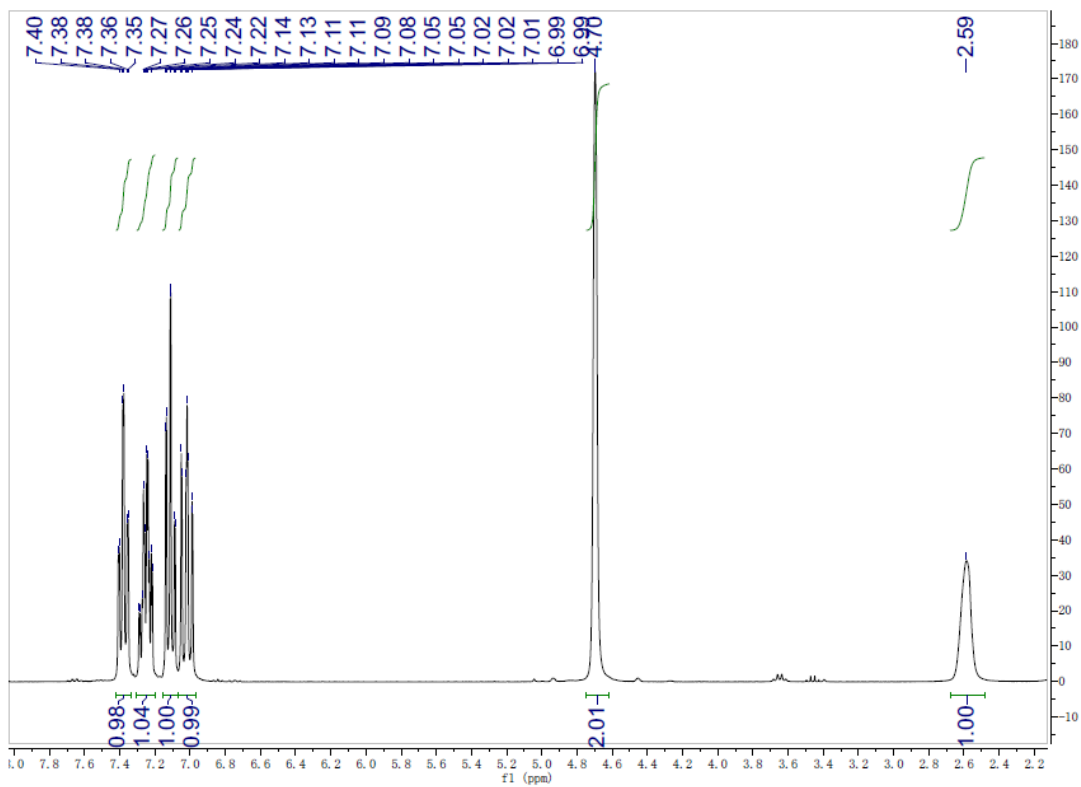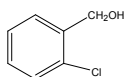

$^1\text{H NMR}$  (300 MHz,  $\text{CDCl}_3$ ,  $\delta$ ): 7.50-7.21 (m, Ar, 4H), 4.80-4.78 (d,  $\text{CH}_2$ , 2H), 1.97 (t, OH, 1H).

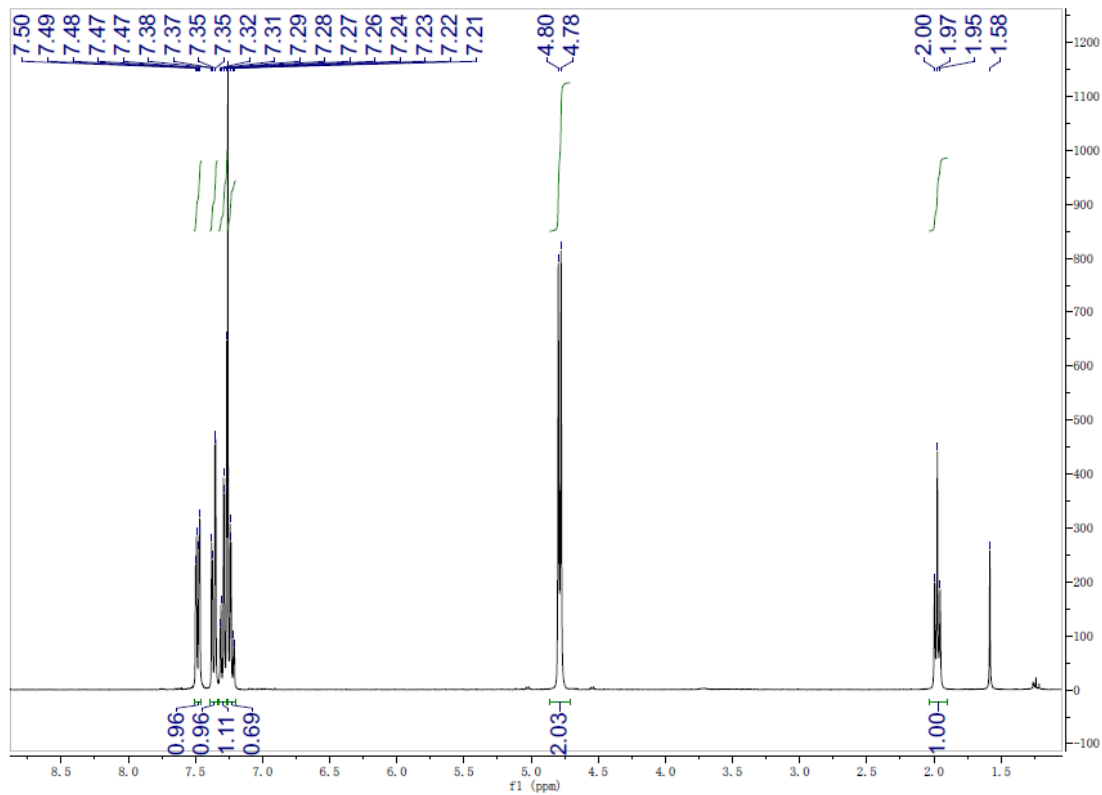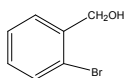

$^1\text{H NMR}$  (300 MHz,  $\text{CDCl}_3$ ,  $\delta$ ): 7.55-7.12 (m, Ar, 4H), 4.72 (s,  $\text{CH}_2$ , 2H), 2.31 (s, OH, 1H).

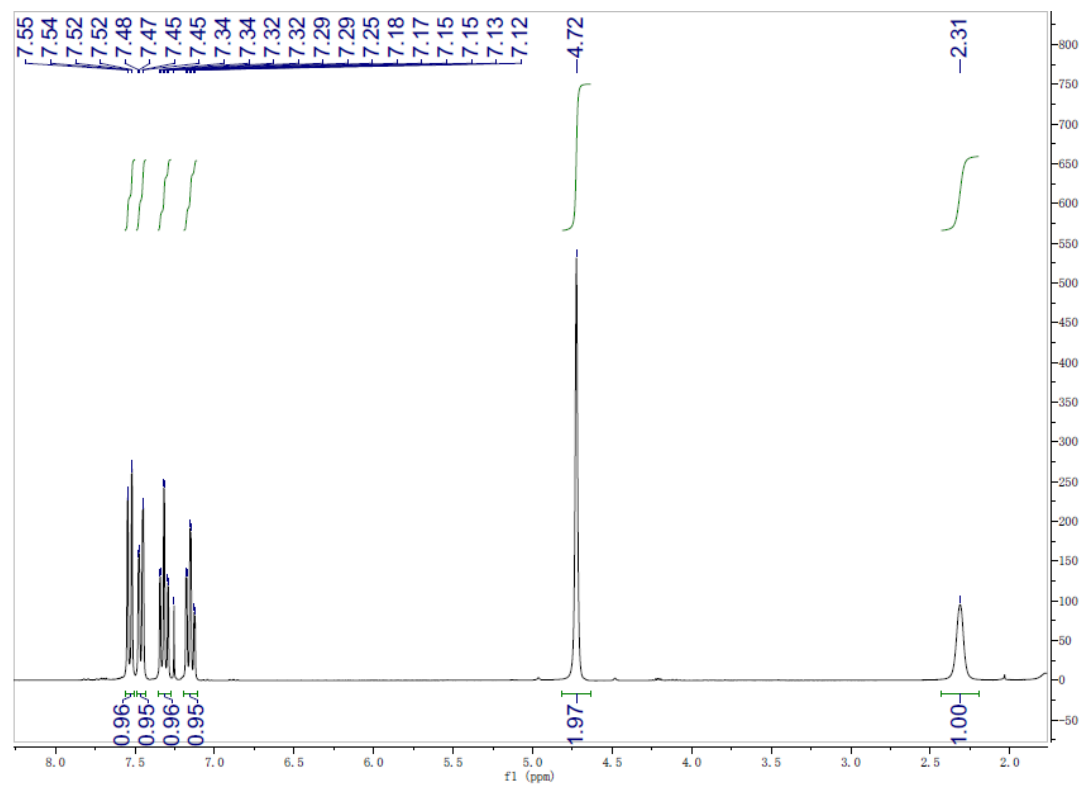

$^1\text{H NMR}$  (300 MHz,  $\text{CDCl}_3$ ,  $\delta$ ): 7.36-7.00 (m, Ar, 4H), 4.66 (s,  $\text{CH}_2$ , 2H), 1.74 (s, OH, 1H).

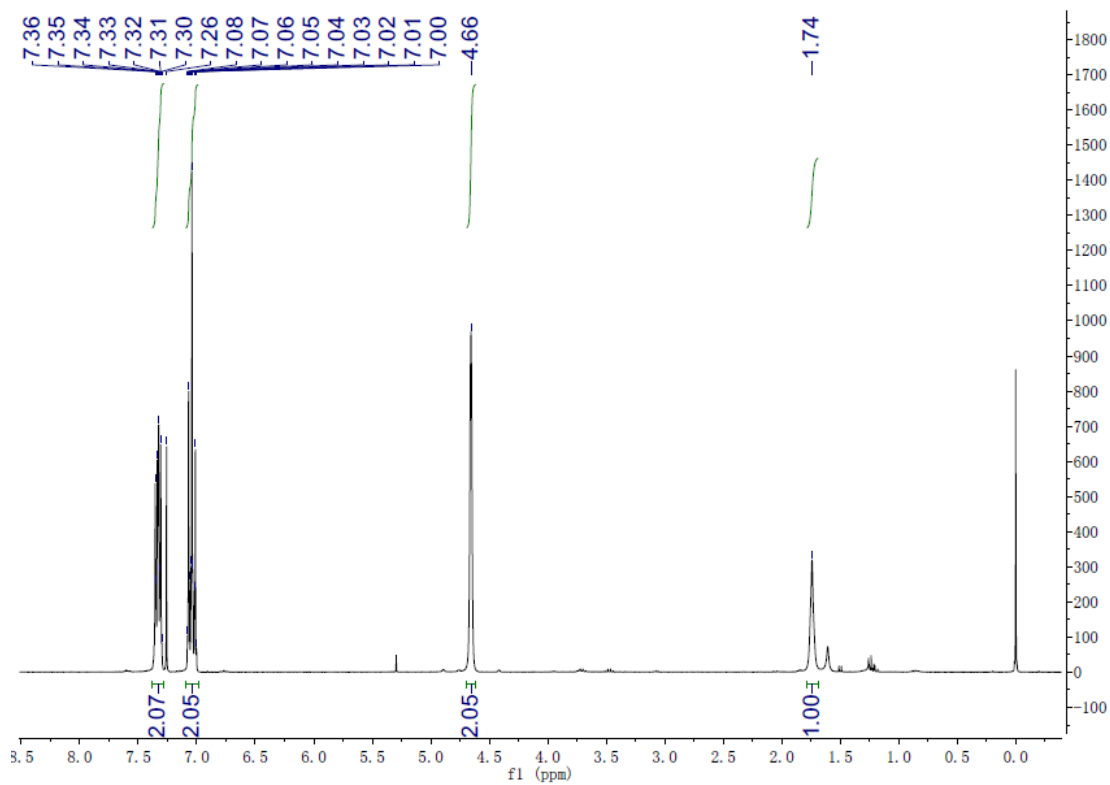



$^1\text{H NMR}$  (300 MHz,  $\text{CDCl}_3$ ,  $\delta$ ): 7.37-7.28 (m, Ar, 4H), 4.67 (d,  $\text{CH}_2$ , 2H), 1.75 (t, OH, 1H).

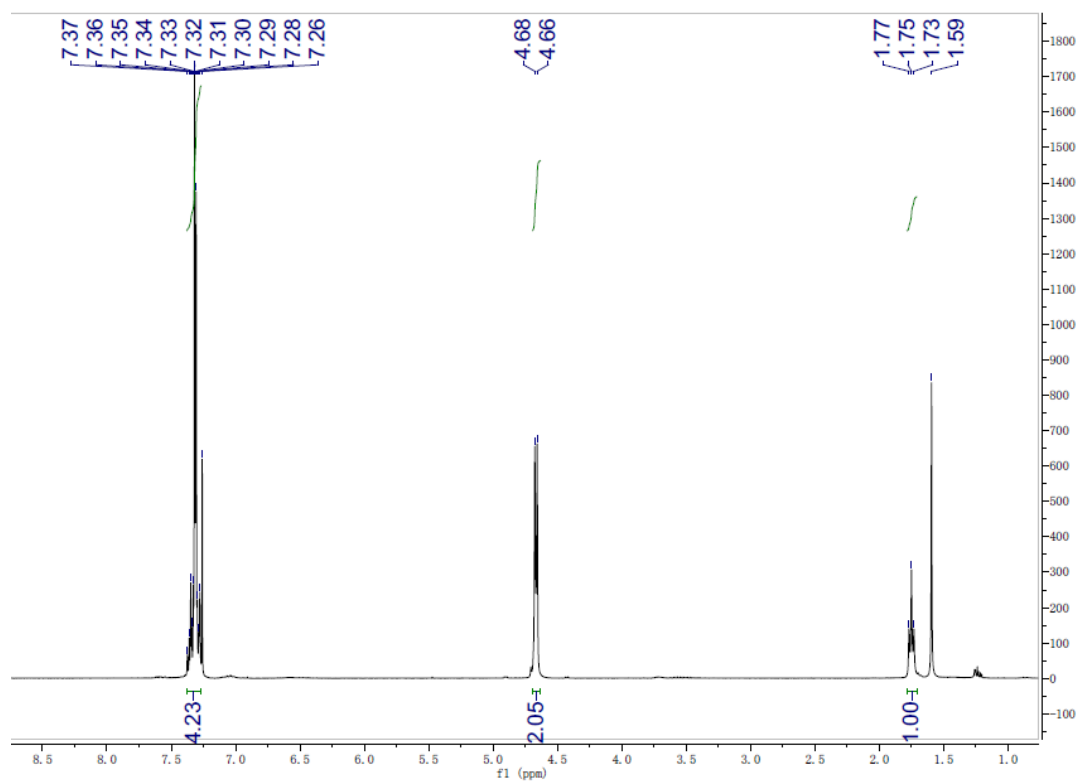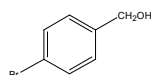

$^1\text{H NMR}$  (300 MHz,  $\text{CDCl}_3$ ,  $\delta$ ): 7.50-7.23 (m, Ar, 4H), 4.67 (t,  $\text{CH}_2$ , 2H), 1.72 (s, OH, 1H).

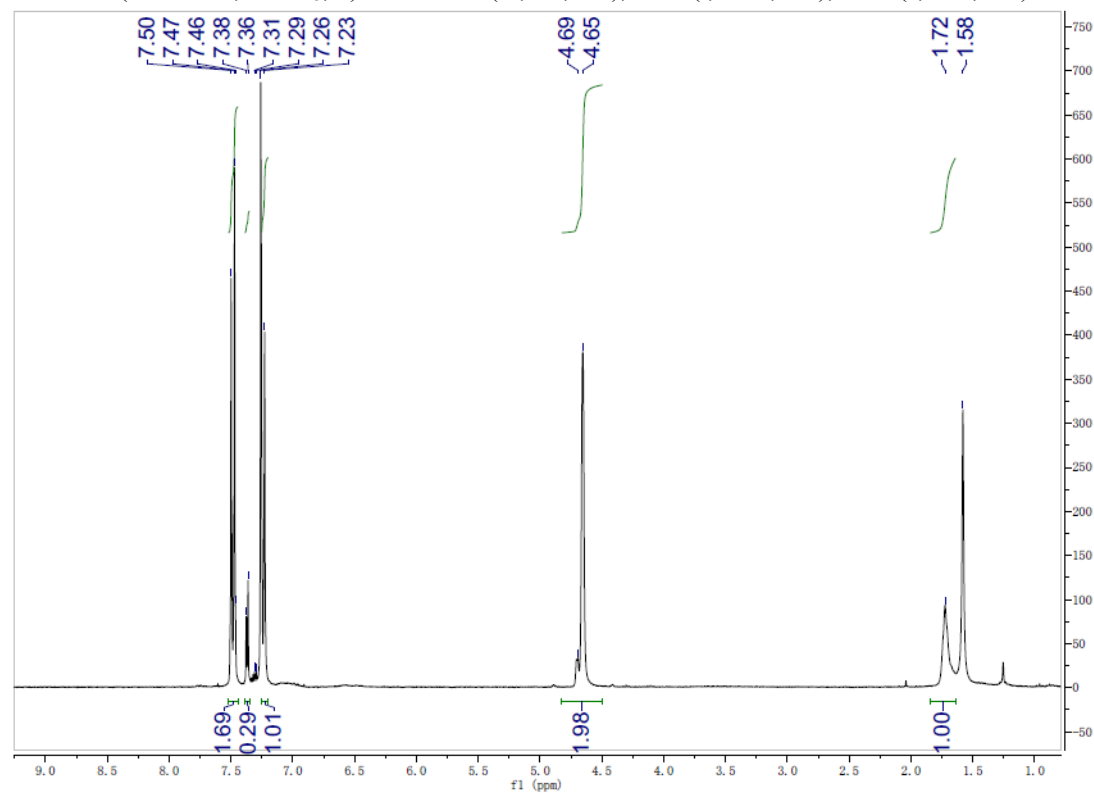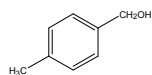

$^1\text{H}$  NMR (300 MHz,  $\text{CDCl}_3$ ,  $\delta$ ): 7.27-7.16 (m, Ar, 4H), 4.65 (s,  $\text{CH}_2$ , 2H), 2.35 (s,  $\text{CH}_3$ , 3H), 1.70 (s, OH, 1H).

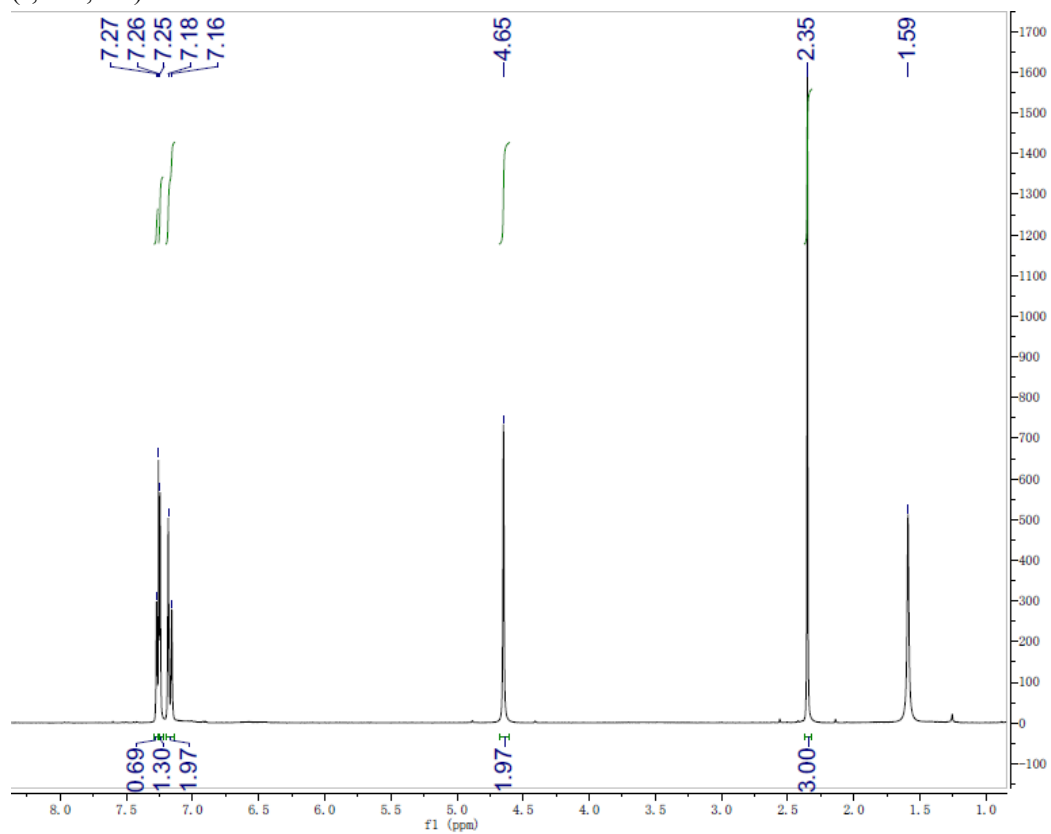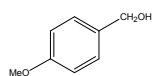

$^1\text{H}$  NMR (300 MHz,  $\text{CDCl}_3$ ,  $\delta$ ): 7.31-6.86 (m, Ar, 4H), 4.61-4.59 (d,  $\text{CH}_2$ , 2H), 3.80 (s,  $\text{CH}_3$ , 3H), 1.73-1.69 (t, OH, 1H).

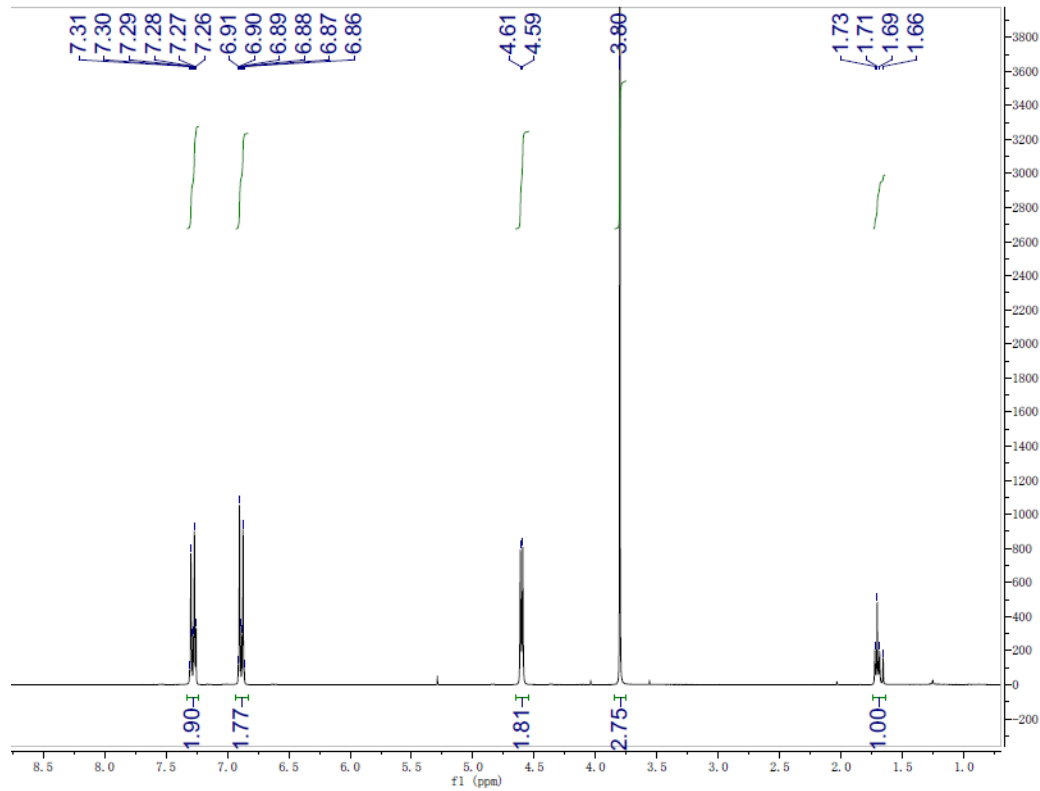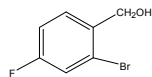

$^1\text{H NMR}$  (300 MHz,  $\text{CDCl}_3$ ,  $\delta$ ): 7.49-7.02 (m, Ar, 3H), 4.73-4.72 (d,  $\text{CH}_2$ , 2H), 1.98-1.94 (t, OH, 1H).

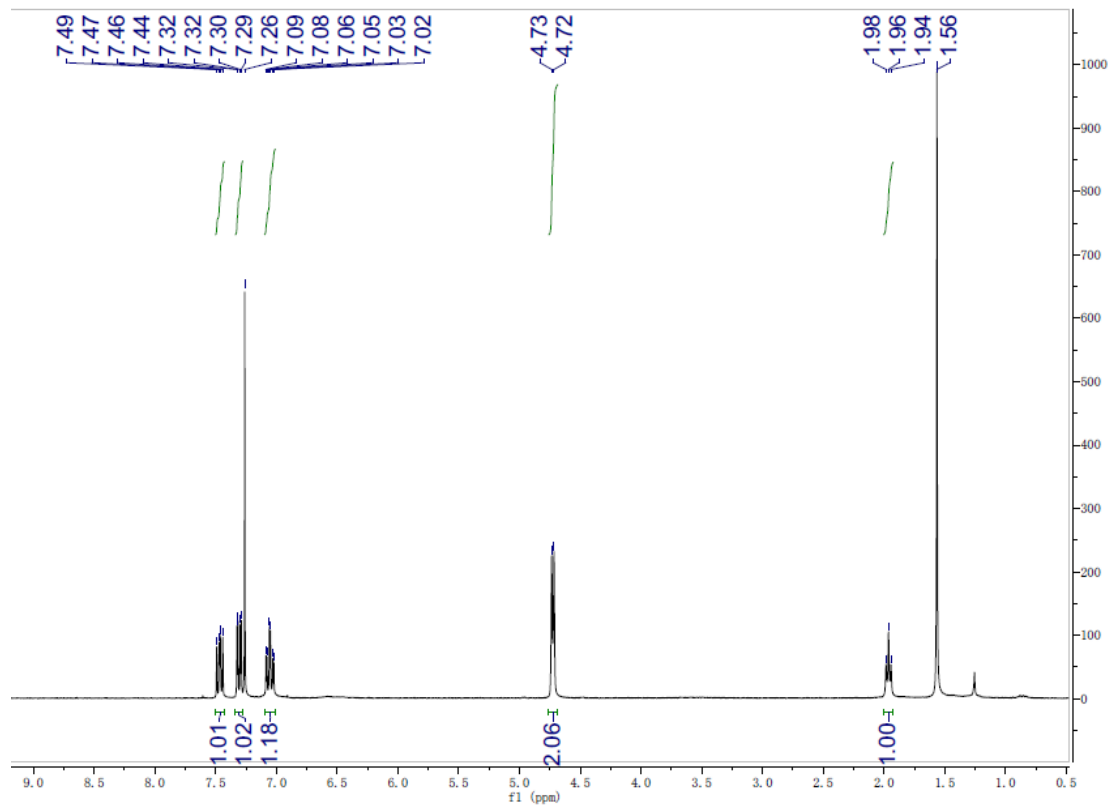

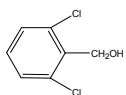

$^1\text{H NMR}$  (300 MHz,  $\text{CDCl}_3$ ,  $\delta$ ): 7.34-7.16 (m, Ar, 3H), 4.96 (s,  $\text{CH}_2$ , 2H), 2.20 (s, OH, 1H).

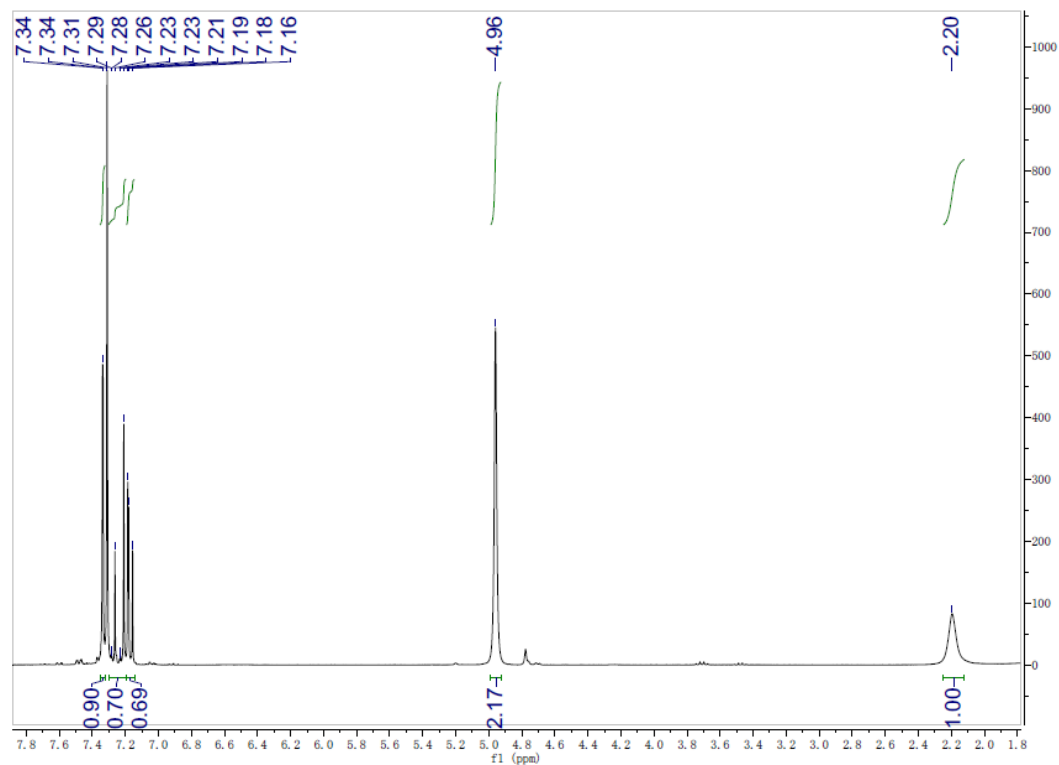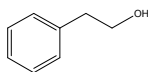

$^1\text{H NMR}$  (300 MHz,  $\text{CDCl}_3$ ,  $\delta$ ): 7.31-7.18 (m, Ar, 5H), 3.78 (t,  $\text{CH}_2$ , 2H), 2.81 (t,  $\text{CH}_2$ , 2H), 2.12 (s, OH, 1H).

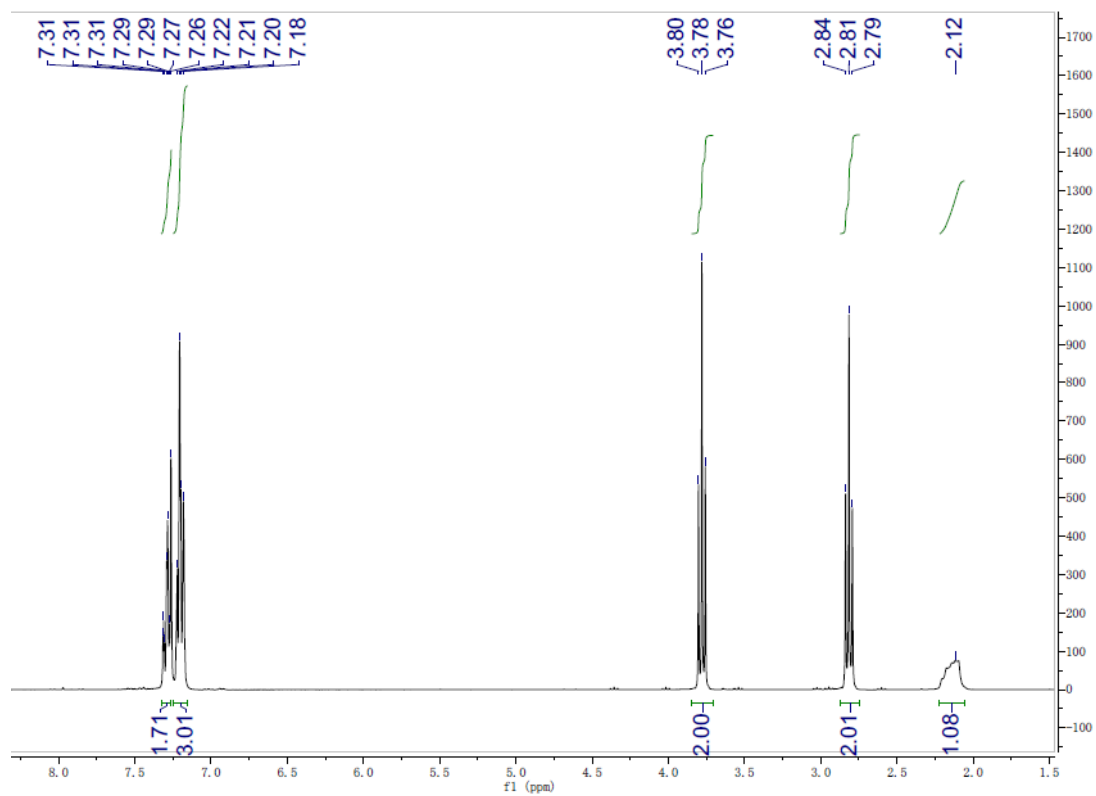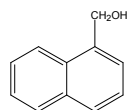

$^1\text{H NMR}$  (300 MHz,  $\text{CDCl}_3$ ,  $\delta$ ): 8.15-7.45 (m, Ar, 7H), 5.17-5.15 (d,  $\text{CH}_2$ , 2H), 1.75 (t, OH, 1H).

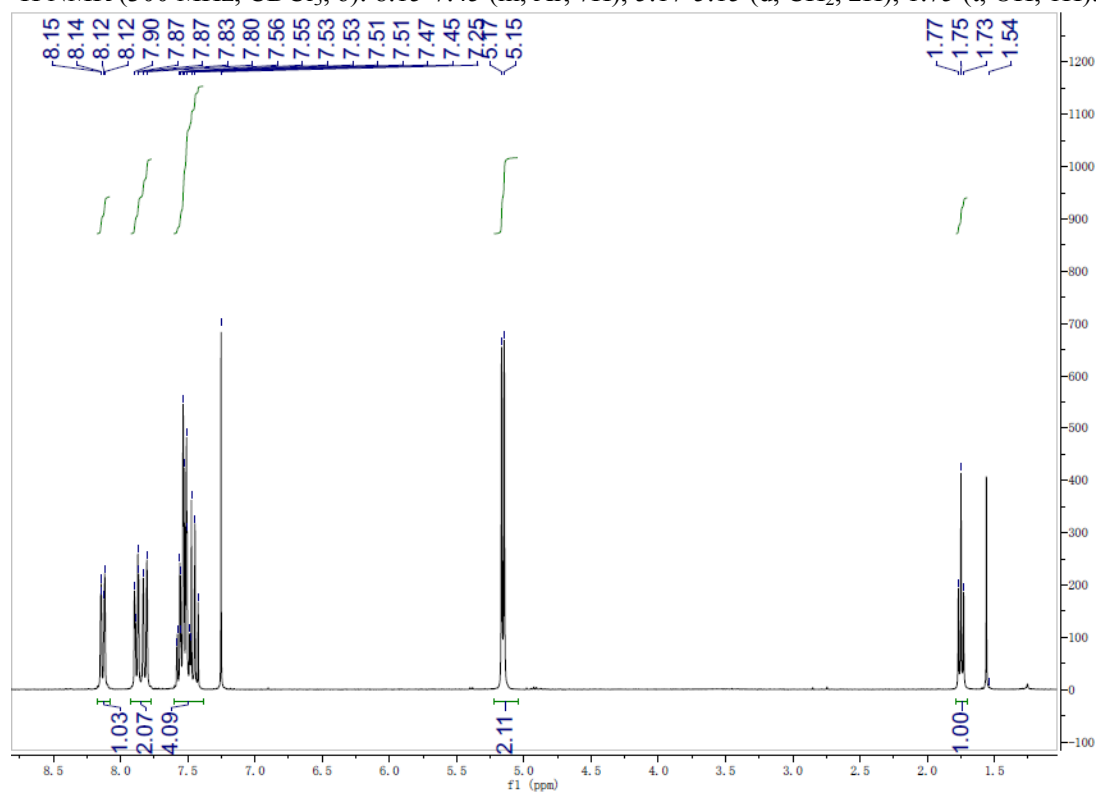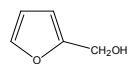

$^1\text{H}$  NMR (300 MHz,  $\text{CDCl}_3$ ,  $\delta$ ): 7.39-6.28 (m, Ar, 3H), 4.57 (s,  $\text{CH}_2$ , 2H), 2.53 (s, OH, 1H).

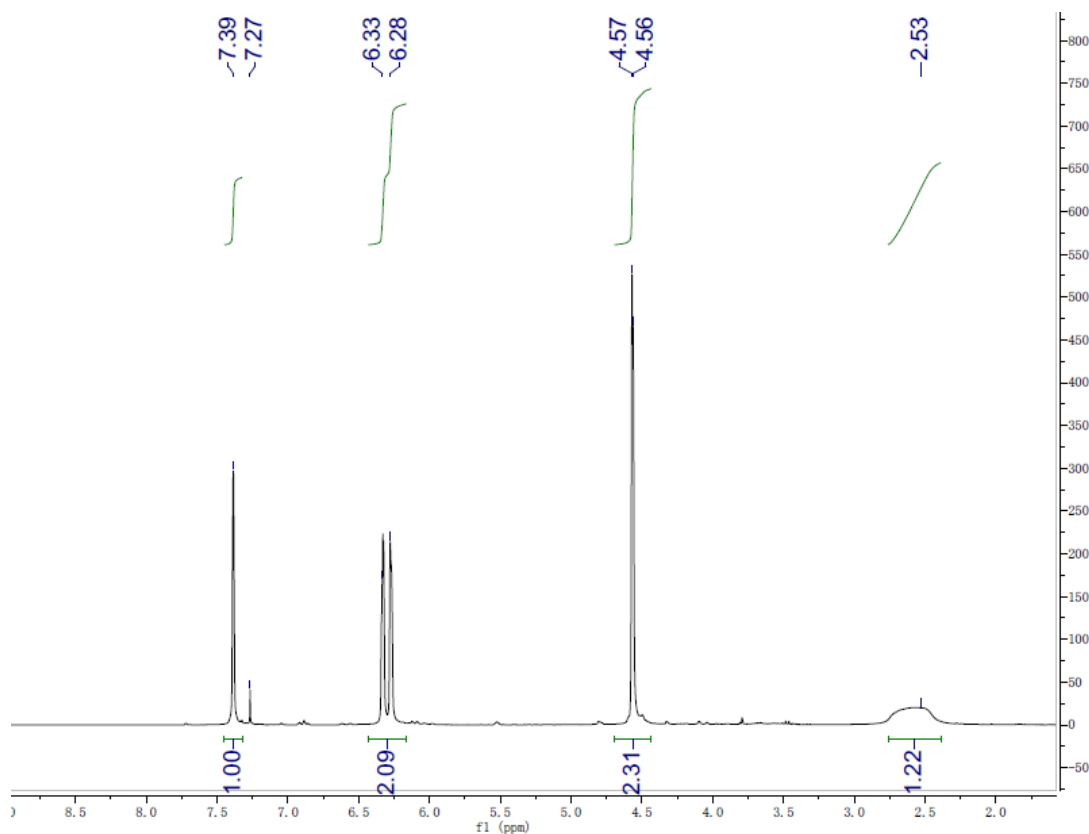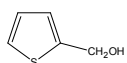

$^1\text{H}$  NMR (300 MHz,  $\text{CDCl}_3$ ,  $\delta$ ): 7.27-6.95 (m, Ar, 3H), 4.79 (s,  $\text{CH}_2$ , 2H), 2.31 (s, OH, 1H).

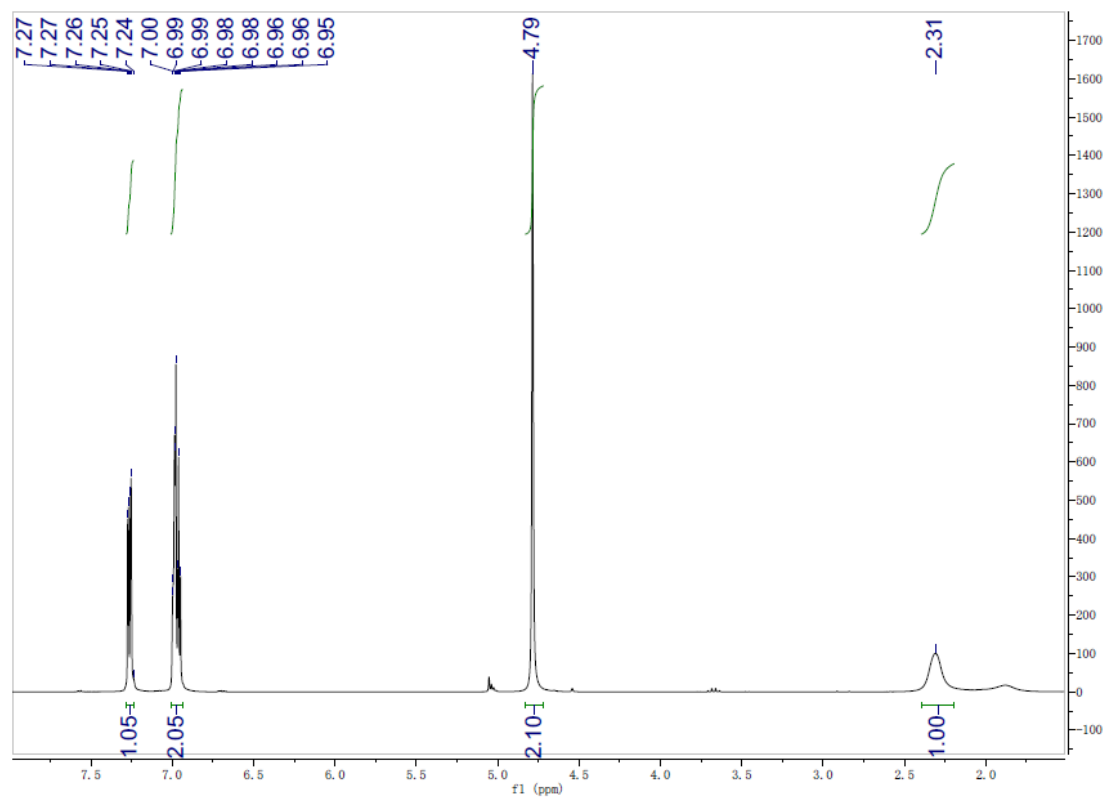

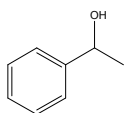

$^1\text{H}$  NMR (300 MHz,  $\text{CDCl}_3$ ,  $\delta$ ): 7.40-7.24 (m, Ar, 5H), 4.88 (q, CH, 1H), 1.86 (s, OH, 1H), 1.51 (d,  $\text{CH}_3$ , 3H).

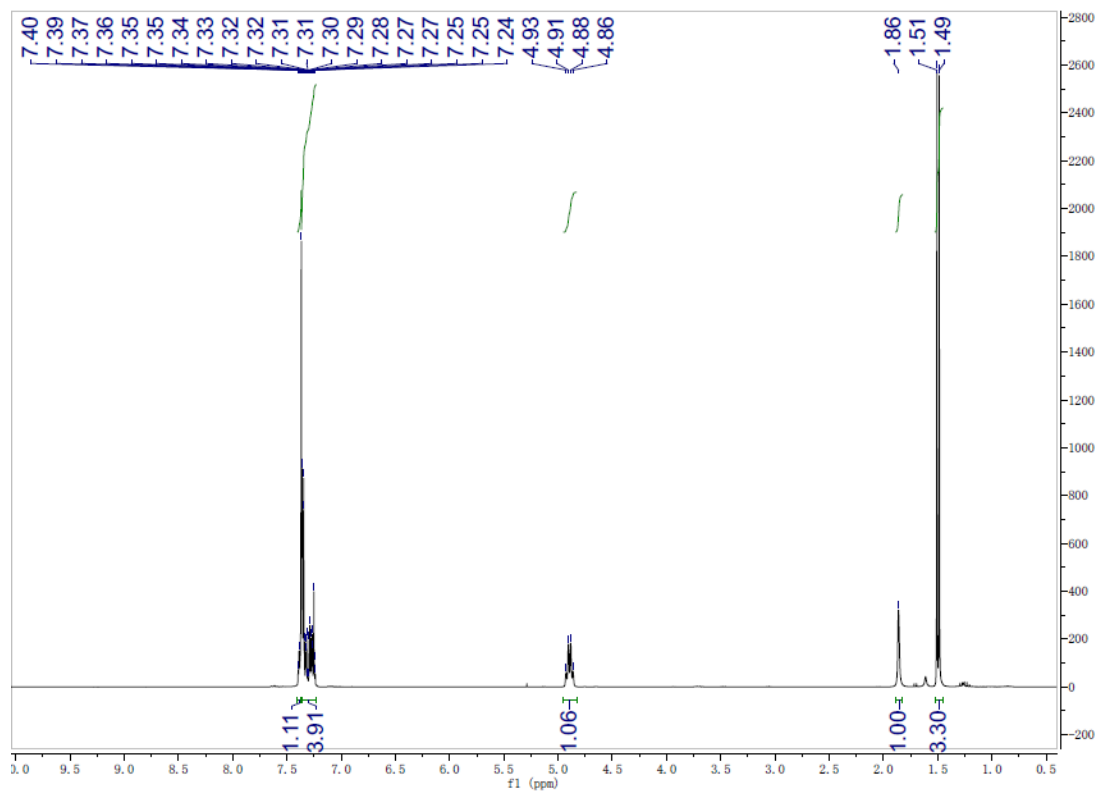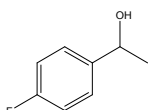

$^1\text{H}$  NMR (300 MHz,  $\text{CDCl}_3$ ,  $\delta$ ): 7.32-6.96 (m, Ar, 4H), 4.85-4.79 (q, CH, 1H), 2.54 (s, OH, 1H), 1.43 (d,  $\text{CH}_3$ , 3H).

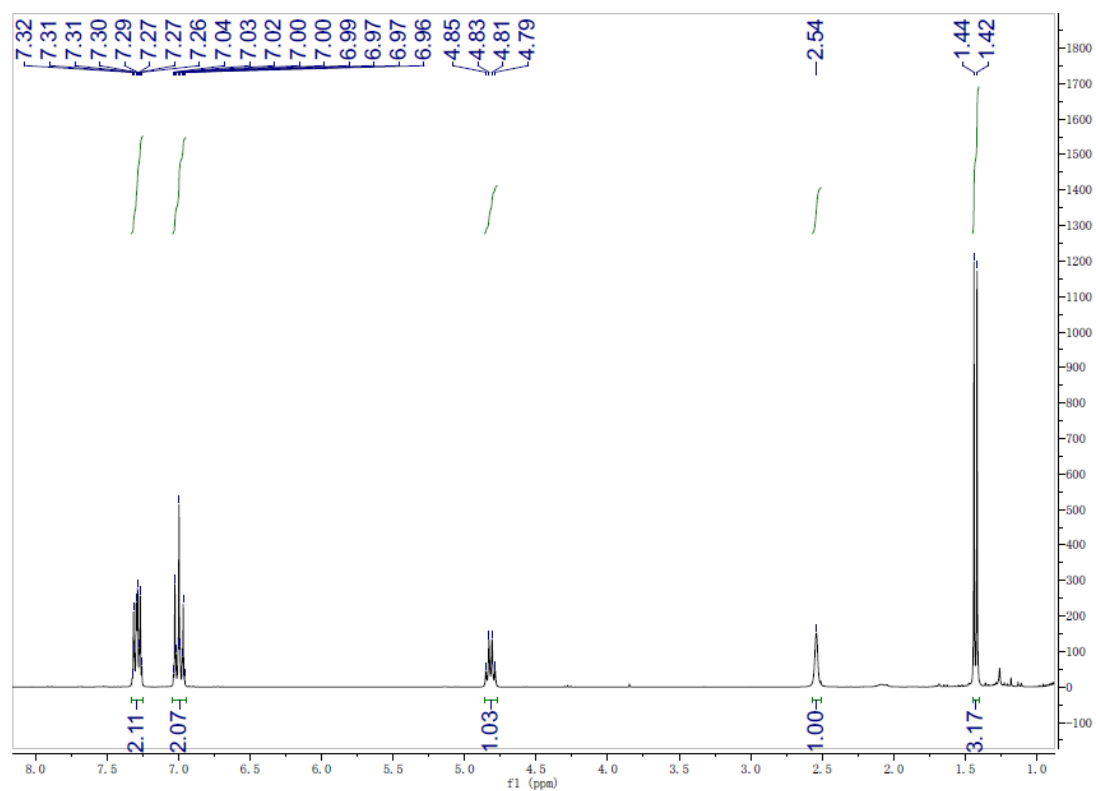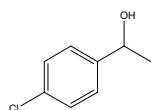

$^1\text{H}$  NMR (300 MHz,  $\text{CDCl}_3$ ,  $\delta$ ): 7.31-7.26 (m, Ar, 4H), 4.88 (q, CH, 1H), 1.89 (s, OH, 1H), 1.47 (d,  $\text{CH}_3$ , 3H).

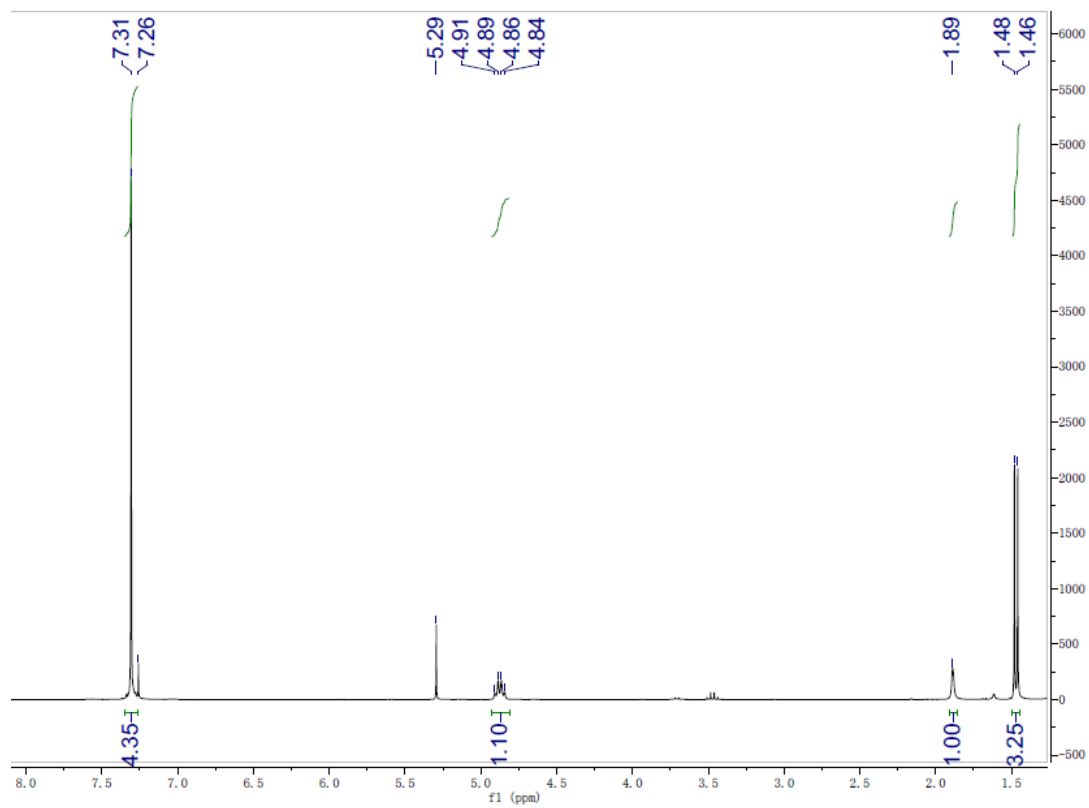



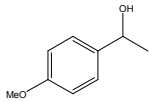

$^1\text{H NMR}$  (300 MHz,  $\text{CDCl}_3$ ,  $\delta$ ): 7.26-6.82 (m, Ar, 4H), 4.78 (q, CH, 1H), 3.76 (s,  $\text{CH}_3$ , 3H), 2.50 (s, OH, 1H), 1.42 (d,  $\text{CH}_3$ , 3H).

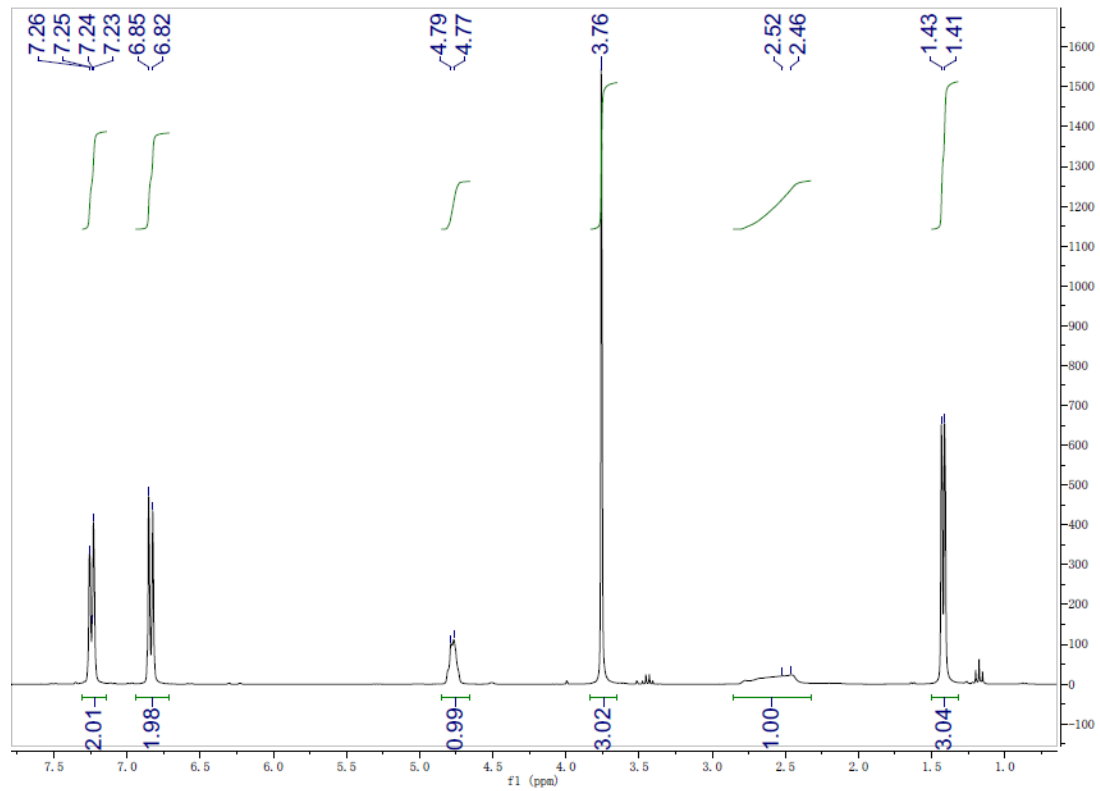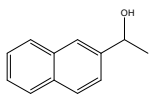

$^1\text{H NMR}$  (300 MHz,  $\text{CDCl}_3$ ,  $\delta$ ): 7.85-7.25 (m, Ar, 7H), 5.07 (m, CH, 1H), 1.92 (s, OH, 1H), 1.58 (d,  $\text{CH}_3$ , 3H).

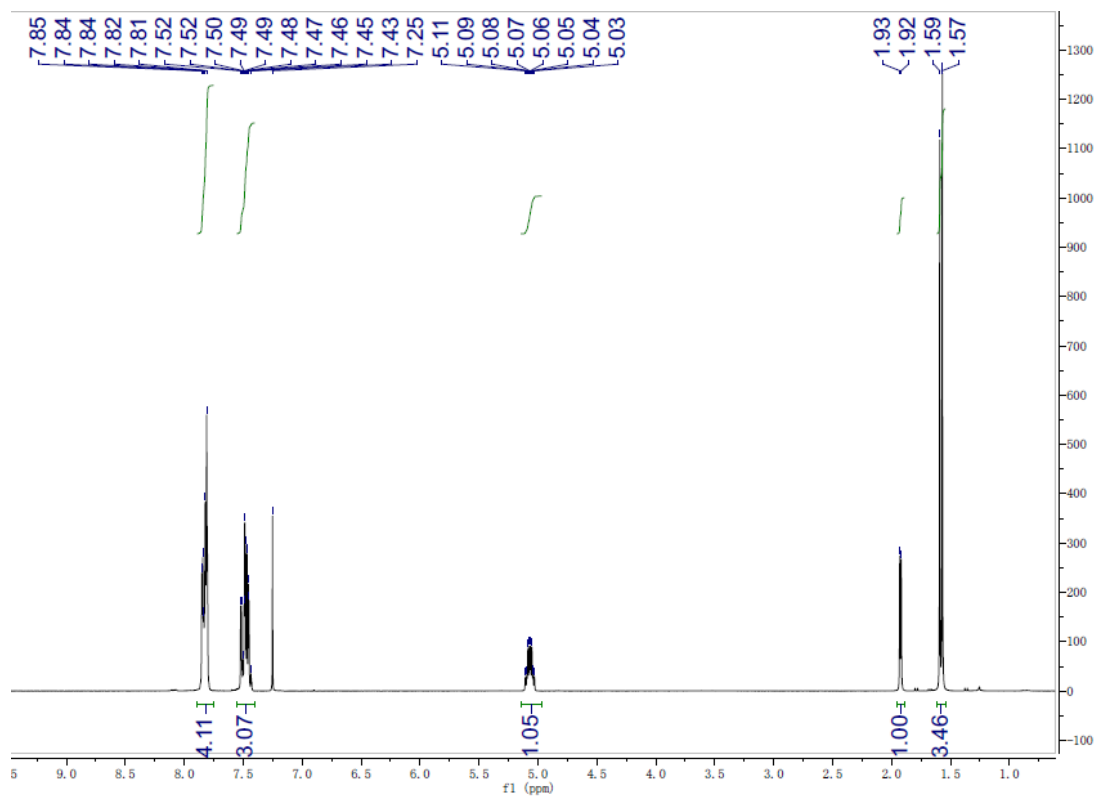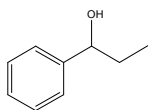

$^1\text{H}$  NMR (300 MHz,  $\text{CDCl}_3$ ,  $\delta$ ): 7.33-7.20 (m, Ar, 5H), 4.49 (t, CH, 1H), 2.50 (s, OH, 1H), 1.72 (m,  $\text{CH}_2$ , 2H), 0.86 (t,  $\text{CH}_3$ , 3H).

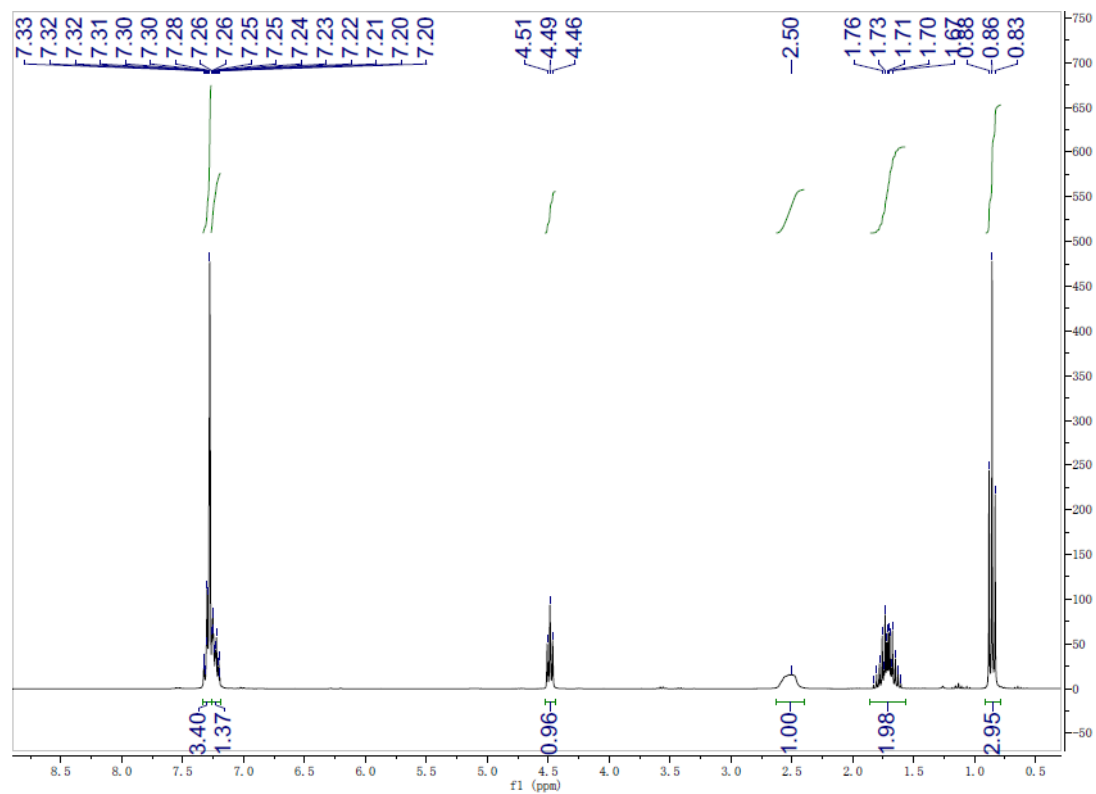

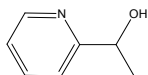

$^1\text{H NMR}$  (300 MHz,  $\text{CDCl}_3$ ,  $\delta$ ): 8.50-7.16 (m, Ar, 4H), 4.90 (q, CH, 1H), 1.50 (d,  $\text{CH}_3$ , 3H).

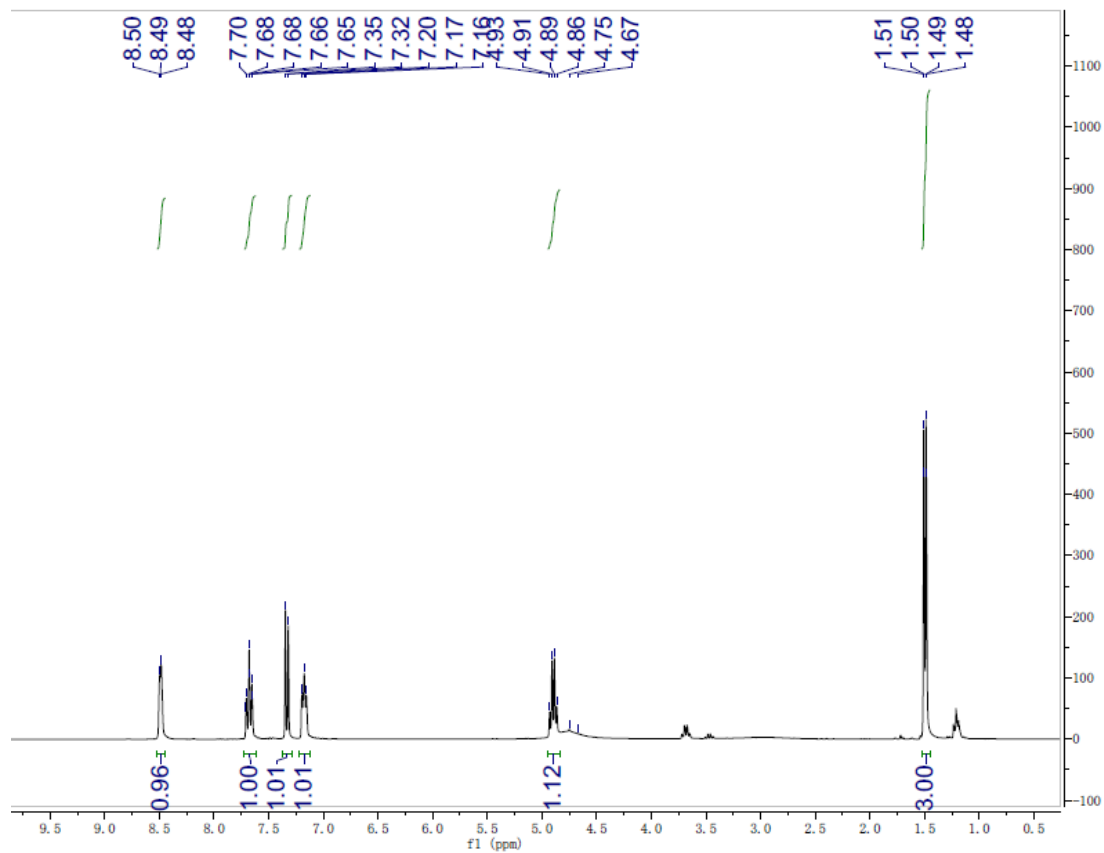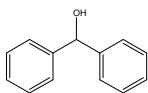

$^1\text{H NMR}$  (300 MHz,  $\text{CDCl}_3$ ,  $\delta$ ): 7.40-7.25 (m, Ar, 7H), 5.85 (d, CH, 1H), 2.20 (d, OH, 1H).

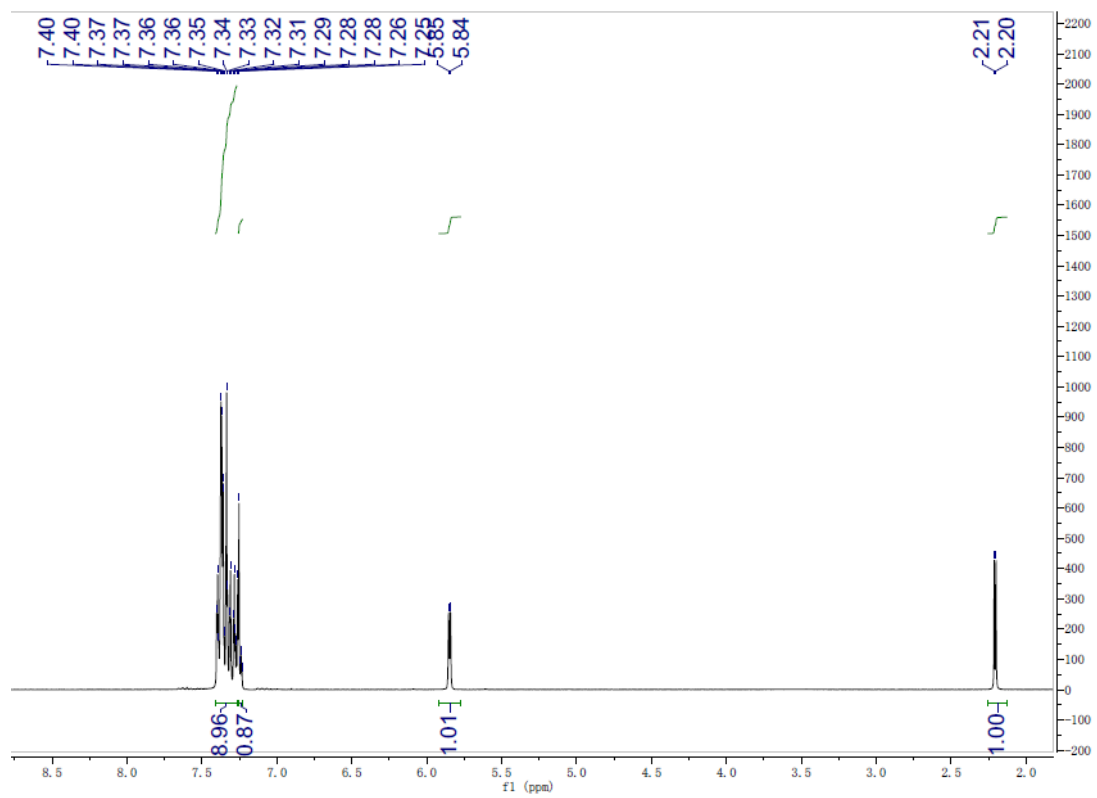

Supplement: c5ra09330a1.pdf [file c5ra09330a1.pdf]
